1                   **Analysis of genetically independent phenotypes identifies shared genetic**  
2                   **factors associated with chronic musculoskeletal pain at different anatomic sites**

3  
4                   Yakov A. Tsepilov<sup>1,2\*</sup>, Maxim B. Freidin<sup>3\*</sup>, Alexandra S. Shadrina<sup>1,2</sup>, Sodbo Z. Sharapov<sup>1,2</sup>,  
5                   Elizaveta E. Elgaeva<sup>2</sup>, Jan van Zundert<sup>4,5</sup>, Lennart C. Karssen<sup>6</sup>, Pradeep Suri<sup>7,8</sup>, Frances M.K.  
6                   Williams<sup>3</sup>, Yurii S. Aulchenko<sup>1,2,6,9^</sup>

7  
8                   <sup>1</sup>Laboratory of Theoretical and Applied Functional Genomics, Novosibirsk State University,  
9                   Novosibirsk, Russia

10                  <sup>2</sup>Laboratory of Recombination and Segregation Analysis, Institute of Cytology and Genetics,  
11                  Novosibirsk, Russia

12                  <sup>3</sup>Department of Twin Research and Genetic Epidemiology, School of Life Course Sciences, King's  
13                  College London, London, UK

14                  <sup>4</sup>Department of Anesthesiology and Pain Medicine, Maastricht University Medical Centre,  
15                  Maastricht, The Netherlands

16                  <sup>5</sup>Department of Anesthesiology and Multidisciplinary Paincentre, ZOL Genk/Lanaken, Belgium

17                  <sup>6</sup>PolyOmica, 's-Hertogenbosch, the Netherlands

18                  <sup>7</sup>Division of Rehabilitation Care Services, VA Puget Sound Health Care System, Seattle, USA

19                  <sup>8</sup>Seattle Epidemiologic Research and Information Center (ERIC), Department of Veterans Affairs  
20                  Office of Research and Development, Seattle, USA

21                  <sup>9</sup>Department of Complex Genetics, Care and Public Health Research Institute, Maastricht  
22                  University, The Netherlands

23  
24                  **Correspondence^: [y.s.aulchenko@polyomica.com](mailto:y.s.aulchenko@polyomica.com)**

28           **Abstract**

29           Chronic musculoskeletal pain has a negative impact on all aspects of human life. Genetic studies  
30 of pain are complicated by the high complexity and heterogeneity of pain phenotypes. In this research,  
31 we aimed to reduce phenotype heterogeneity and reveal genes and pathways shared by chronic  
32 musculoskeletal pain at four locations: back, neck/shoulder, hip, and knee. Our study was based on the  
33 results of genome-wide association studies performed using UK Biobank data with a total sample size  
34 of 456,000 individuals. We applied principal component analysis based on the matrix of genetic  
35 covariances between the studied pain traits and constructed four genetically independent phenotypes  
36 (GIPs). The leading GIP (GIP1) explains the largest proportion of the genetic variance of and  
37 covariance between the analyzed phenotypes (78.4%), and the later GIPs (GIP2-4) explain  
38 progressively less. We identified and replicated five loci associated with GIP1 and one locus associated  
39 with GIP2. The genes decisively prioritized for the GIP1-associated loci were *SLC39A8*, *ECM1*, and  
40 *FOXP2*. For the remaining two GIP1-associated loci, we proposed several candidates (*AMIGO3*, *BSN*,  
41 *RBM6*, *FAM212A*, *RNF123*, *UBA7* and *MIR7114*, *NSMF*, *NOXA1*, *GRIN1*), but were unable to  
42 prioritize any of them convincingly. The most likely causal gene in the locus associated with GIP2 was  
43 *GDF5*. For GIP1, gene set/tissue/cell type enrichment analyses identified multiple terms related to the  
44 nervous system. Genetic correlations analysis revealed a genetic overlap between GIP1 and  
45 osteoarthritis as well as a set of anthropometric (such as overweight and waist circumference),  
46 sociodemographic (such as age of first birth and college completion) and psychiatric/personality (such  
47 as depressive symptoms and neuroticism) traits. We suggest that GIP1 represents a biopsychological  
48 component of chronic musculoskeletal pain, related to physiological and psychological aspects and  
49 likely reflecting pain perception and processing.

50

## 51 **Introduction**

52 Chronic pain is one of the most prevalent human health problems, affecting on average 20-30%  
53 of adults [1-3], and it is one of the most challenging conditions for clinical management [4]. Often  
54 chronic pain is present without a clear pathophysiological cause such as tissue damage and cannot be  
55 attributed to a known disorder. Chronic musculoskeletal pain is the most prevalent type of chronic pain  
56 in older adults [5]. Prevalence estimates vary widely depending on the studied population and the  
57 definition used to define these conditions [6]. For instance, in a Swedish study, the prevalence was  
58 23.9% for chronic regional musculoskeletal pain and 11.4% for chronic widespread pain [7]. In Japan,  
59 the prevalence of chronic musculoskeletal pain was found to be 15.4% in the general population and  
60 reached 18.6% among individuals aged 40-49 [8]. The most prevalent self-reported chronic  
61 musculoskeletal pain conditions are low back, neck, and shoulder pain [7, 8]. According to the Global  
62 Burden of Disease Study 2015, low back pain and neck pain were the leading causes of global years  
63 lived with disability in 1990-2015 [9].

64 Precise biological mechanisms underlying chronic pain are yet to be elucidated [10, 11]. There  
65 is good evidence that chronic pain disorders are complex heritable traits [12, 13]. Exploring the genetic  
66 underpinning of chronic pain phenotypes can expand basic knowledge on their etiology and biological  
67 mechanisms, improve diagnostics, and facilitate the development of effective therapies via the  
68 identification of therapeutic targets.

69 Genetic association studies have suggested a number of genes associated with chronic  
70 musculoskeletal pain phenotypes [14-16]. These studies were predominantly hypothesis-driven  
71 candidate-gene studies, which often had small samples sizes, and with some leading to conflicting  
72 results as has been borne out in other traits [17]. Compared to candidate-gene studies, genome-wide  
73 association studies (GWAS) offer an agnostic data-driven approach that allows identification of  
74 susceptibility genes without a prior mechanistic hypothesis. So far, only a few GWAS for forms of  
75 chronic musculoskeletal pain have been published, including chronic widespread pain [18],  
76 fibromyalgia [19], chronic back pain [20], sciatica [21], and painful temporomandibular disorder [22].  
77 Thus, the genetic architecture of chronic musculoskeletal pain is far from being defined.

78 Research in chronic pain genetics faces a number of obstacles. According to the biopsychosocial  
79 model of pain, chronic pain results from a complex and dynamic interaction among biological,  
80 psychologic and social factors [23]. The extreme complexity and heterogeneity of chronic pain  
81 phenotypes complicates identification of novel loci and makes it difficult to distinguish whether  
82 identified variants affect the risk of the primary pain-causing pathology (if any) or influence the  
83 development and maintenance of the chronic pain state itself. Both the primary underlying condition  
84 and its treatment, and the treatment of chronic pain, may confound studies. A study exemplifying these  
85 challenges is our recent GWAS of chronic back pain [18]. Despite the large sample size of nearly  
86 158,000 individuals in the discovery sample and 284,000 subjects in the replication sample, we were  
87 able to detect and replicate only one locus. Thus, new strategies are required to improve understanding  
88 of the genetic influences in chronic pain conditions.

89 One possible solution to the problem of clinical heterogeneity is to study endophenotypes and  
90 subgroups of patients having different characteristics [15]. A complementary approach to reducing  
91 heterogeneity is to elucidate the common pathways shared by distinct pain phenotypes. Indeed,  
92 different chronic pain conditions may have common biological pathways such as those related to pain  
93 perception and processing. Several studies have provided evidence for shared genetic factors between

94 conditions manifesting chronic pain [24] as well as pain at different anatomical sites [25, 26]. However,  
95 to the best of our knowledge, no study yet published has explicitly identified these genetic factors.

96 Here, we investigated the genetic factors underlying chronic musculoskeletal pain reported at  
97 four locations (back, neck/shoulder, hip, and knee). These anatomical sites are commonly affected by  
98 osteoarthritis (OA). Pain is the predominant symptom of OA, but its intensity may be poorly correlated  
99 with OA severity based on pathological changes revealed by radiographs. Current evidence suggests  
100 that not only structural lesions, but also neuronal pathways and alterations of pain processing contribute  
101 to maintaining pain in OA patients [27]. We assumed that studying pain at multiple sites potentially  
102 linked through OA can unravel shared musculoskeletal pathways and, more importantly, provide  
103 deeper understanding of general chronic pain mechanisms. We used a novel approach to explore the  
104 genetic background of pain traits by analyzing genetically independent phenotypes (GIPs). Using data  
105 from UK Biobank [28] we identified and replicated specific loci associated with these GIPs, followed  
106 by *in silico* functional analysis, including a search for pleiotropic effects of functional variants,  
107 prioritization of likely causal genes, analysis of gene set and tissue enrichment, and estimation of  
108 genetic correlations with other complex traits.  
109

## 110 **Methods**

### 111 ***Study sample and phenotype definition***

112 The study sample comprised UK Biobank participants [28]. Sociodemographic, physical,  
113 lifestyle, and health-related characteristics of this cohort have been reported elsewhere [29]. In brief,  
114 individuals enrolled in the UK Biobank study were aged 40–69 years; were less likely to be obese, to  
115 smoke, to drink alcohol; had fewer self-reported health conditions as compared to the general  
116 population. All study participants provided written informed consent, and the study was approved by  
117 the North West Multi-Centre for Research Ethics Committee (11/NW/0382).

118 This particular study was approved by the UK Biobank research team under project #18219.  
119 Cases and controls were defined based on questionnaire responses. First, participants responded to  
120 “Pain type(s) experienced in the last months” followed by questions inquiring if the specific pain had  
121 been present for more than 3 months. Those who reported back, neck or shoulder, hip, or knee pain  
122 lasting more than 3 months were considered chronic back, neck/shoulder, hip, and knee pain cases,  
123 respectively. Participants reporting no such pain lasting longer than 3 months were considered controls  
124 (regardless of whether they had another regional chronic pain, such as abdominal pain, or not).  
125 Individuals who preferred not to answer or reported more than 3 months of pain all over the body were  
126 excluded from the study (since these subjects met criteria for chronic widespread pain and were thought  
127 likely to have an underlying generalized propensity to pain). Further details are given in Supplementary  
128 Methods.

129 Overall, 456,580 individuals with imputed genotype data and phenotype data were included in  
130 the present study. Of these, 265,000 participants of European ancestry (defined by SNP-based principal  
131 component analysis) were randomly selected to provide the GWAS discovery cohort. The decision to  
132 include only Europeans was based solely on the highest representation of these individuals among the  
133 UK Biobank participants. The replication cohort (N = 191,580) comprised individuals of African (N =  
134 7,541) and South Asian ancestry (Indian, Pakistani, and Bangladeshi; N = 9,208) as well as the  
135 remaining European ancestry participants (N = 174,831). Descriptive characteristics of the groups is  
136 provided in Table S1.

### 137 ***Genotyping and imputation***

138 Genotyping and imputation data were obtained from the UK Biobank March 2018 data release.  
139 Genotyping was conducted using the Affymetrix UK BiLEVE and Affymetrix UK Biobank Axiom  
140 arrays. Imputation was performed with the IMPUTE4 program (<https://jmarchini.org/impute-4/>) [30]  
141 using the Haplotype Reference Consortium (HRC) [31] and merged UK10K and 1000 Genomes phase  
142 3 reference panels. Details on DNA extraction and quantification [32] as well as on the centralized  
143 analysis of the genetic data, genotype quality, properties of population structure and relatedness of the  
144 genetic data, and efficient phasing and genotype imputation have been reported previously [33].

### 145 ***Genome-wide association study***

146 GWAS were carried out using BOLT-LMM v.2.3.2 software [34]. Linear mixed-effects models  
147 were fitted to test for additive effects of the SNPs (genotype dosage) on pain phenotypes adjusting for  
148 age, sex, genotyping platform batch and the first ten genetic principal components. The following  
149 filters were applied: minor allele frequency > 0.0002 for Europeans and > 0.005 for Africans and  
150 Asians; imputation quality score > 0.7; genotyping and individual call rates > 0.98. Only biallelic  
151 autosomal SNPs and indels were analyzed. BOLT-LMM software requires LD score data for the

152 analysis. For Europeans, we used LD scores distributed as part of BOLT-LMM package. For Africans  
153 and South Asians, we carried out LD score estimation using LD score software [35] and data from 500  
154 individuals randomly selected from each ethnic group. The results of GWAS were corrected for  
155 residual inflation using the LD score regression intercept [35].

### 156 ***Locus definition***

157 Associated loci were defined as regions within  $\pm 250$  kb around the lead SNP. Only the most  
158 significant SNP per locus was reported.

### 159 ***Genetically independent phenotypes***

160 To elucidate genetic components explaining four chronic musculoskeletal pain phenotypes  
161 (chronic back, neck/shoulder, hip, and knee pain), we used a modified principal component analysis  
162 (PCA) technique that combines multiple correlated variables into a set of uncorrelated principal  
163 components (PCs). PCs are linear combinations of variables constructed such that the first PC explains  
164 the maximum proportion of the total variance of the set of traits, the second PC accounts for the largest  
165 proportion of the remaining variance, and so on. In conventional PCA of a set of traits, vectors of  
166 coefficients of orthogonal transformation are equal to the eigenvectors of the matrix of phenotypic  
167 covariance. In the present study, we used the matrix of genetic covariances between the traits of interest  
168 to decompose them into genetically independent components, that we called *genetically independent*  
169 *phenotypes* (GIPs). GIPs are not correlated genetically and the first GIP (GIP1) explains most of the  
170 genetic variance of -and covariance between- four musculoskeletal pain phenotypes. Technical details  
171 of our approach are described in Supplementary Methods. It should be noted that principal component  
172 analysis has already been used for studying genetic background of complex traits [36, 37], although it  
173 was applied to obtain phenotypically independent phenotypes, not GIPs. In both cases heritability of  
174 obtained principal components was not less than heritability of original traits.

175 The matrix of genetic covariances (estimated by LD Score regression [38]) and orthogonal  
176 transformation coefficients were obtained using the discovery cohort of European ancestry individuals.  
177 The 95% confidence intervals of these coefficients were estimated via the Monte Carlo sampling. For  
178 each resulting “discovery” GIP, GWAS results were calculated as described in Supplementary  
179 Methods.

180 GIPs for replication datasets were constructed using the orthogonal transformation coefficients  
181 obtained at the discovery step. GWAS results for each “replication” GIP were combined by a meta-  
182 analysis. Furthermore, GWAS for GIPs for European ancestry replication cohort (N = 439,831 in total)  
183 were meta-analyzed with GWAS for discovery GIPs, and the results were used for subsequent post-  
184 GWAS *in silico* analyses. Meta-analyses were conducted using the inverse-variance-weighted  
185 approach (fixed-effects model) with METAL software [39].

186 Additionally, we used the same methodology to obtain the first GIP for the extended set of pain  
187 traits available in the UK Biobank: chronic back, neck/shoulder, hip, knee, stomach/abdominal pain  
188 and headache. Facial pain, which is also present in the UK Biobank database, was not included in the  
189 analysis due to low prevalence (0.9% in European ancestry dataset, 4016 cases and 435815 controls)  
190 and statistically insignificant SNP-based heritability, that makes the genetic correlation analysis  
191 impossible. GIP1 for six pain phenotypes was constructed for the discovery and European ancestry  
192 replication cohort, and GWAS results for these cohorts were meta-analyzed. GIP1 for six pain  
193 phenotypes was included in the analysis of genetic correlation with GIP1 for four pain phenotypes.

194 ***Conditional analysis***

195 Conditional and joint (COJO) analysis was carried out as previously described [40]. Calculations  
196 were performed using the GCTA software [41]. Linkage disequilibrium (LD) matrix was computed  
197 with PLINK 1.9 software (<https://www.cog-genomics.org/plink2>) using 100,000 individuals randomly  
198 selected from the discovery cohort. We claimed one independent signal per locus if no polymorphism  
199 other than the lead SNP passed the significance threshold of  $P = 5e-08$ . Regional association plots were  
200 generated using LocusZoom (<http://locuszoom.org/>) for regions within  $\pm 250$  kb from the lead SNP.

201 ***Prediction of SNP effects***

202 We analyzed the functional effects of a set of SNPs and indels in high LD ( $r^2 > 0.8$ ) with  
203 replicated variants. LD was calculated using PLINK 1.9 [42] (*--show-tags* option) and genotype data  
204 for 503 European ancestry individuals (1000 Genomes phase 3 version 5 data). Additionally, we  
205 selected SNPs within replicated regions ( $\pm 250$  kb from lead SNPs) associated with GIPs at  $P \leq T$ ,  
206 where  $\log_{10}(T) = \log_{10}(P_{\min}) + 1$ , and  $P_{\min}$  is a  $P$ -value for the strongest association per locus. These  
207 SNPs were added in the analysis since genotype data for the UK Biobank samples were imputed using  
208 the Haplotype Reference Consortium (HRC) panel, and some HRC SNPs could possibly be missed in  
209 the 1000 Genomes panel. All selected variants were annotated using the Ensembl Variant Effect  
210 Predictor (VEP) [43] as well as FATHMM-XF [44] and FATHMM-INDEL [45]. In the latter two  
211 methods, predictions of variant effects were made according to scores ranging from 0 to 1, with scores  
212 above 0.5 predicted to be deleterious while those below 0.5 predicted to be neutral or benign.

213 ***DEPICT and FUMA analyses***

214 Gene set and tissue/cell type enrichment analyses and gene prioritization were performed using  
215 the Data-driven Expression Prioritized Integration for Complex Traits (DEPICT) tool [46]. We  
216 employed the DEPICT software version 1.1, release 194 with default parameters  
217 (<https://data.broadinstitute.org/mpg/depict/>). Tests were conducted for both genome-wide significant  
218 SNPs ( $P < 5e-08$ ) and for SNPs associated with GIPs at  $P < 1e-05$ . The MHC region was omitted. The  
219 significance threshold for DEPICT analyses was set at  $FDR < 0.05$ .

220 Gene set and tissue enrichment analyses were also performed using the FUMA (Functional  
221 Mapping and Annotation of Genome-Wide Association Studies) platform [47] (GENE2FUNC  
222 function, with default parameters) based on the MAGMA method [48] and the MsigDB c5 database  
223 [49]. The significance threshold for FUMA analyses was set at Bonferroni-corrected  $P$ -value  $< 0.05$ .

224 ***SMR/HEIDI analysis***

225 Summary data-based Mendelian Randomization (SMR) analysis followed by the Heterogeneity  
226 in Dependent Instruments (HEIDI) test [50] was used to study potential pleiotropic effects of identified  
227 loci on GIPs, human complex traits, and gene expression levels in different tissues. SMR analysis  
228 provides evidence for pleiotropy (the same locus is associated with two or more traits). It cannot define  
229 whether traits in a pair are affected by the same underlying causal polymorphism, and this is specified  
230 by a HEIDI test, which distinguishes pleiotropy from linkage disequilibrium. It should be noted that  
231 SMR/HEIDI analysis does not identify which allele is causal and cannot distinguish pleiotropy from  
232 causation.

233 Summary statistics for gene expression levels was obtained from Westra Blood eQTL (peripheral  
234 blood, <http://cnsgenomics.com/software/smr/#eQTLsummarydata>) [51] and the GTEx version 7

235 database (48 tissues, <https://gtexportal.org>) [52]. Summary statistics for other complex traits were  
236 derived from the GWAS-MAP database [53] developed by our group. The GWAS-MAP platform  
237 integrates a database of summary-level GWAS results for 673 complex traits from the UK Biobank,  
238 123 metabolomics traits, 1,206 circulating proteins, 41 cytokines and growth factors, 190 plasma  
239 protein and IgG N-glycosylation traits, inflammatory bowel disease (including Crohn's disease), and 8  
240 traits related to coronary artery disease, myocardial infarction, and factors associated with these  
241 conditions. Summary statistics for the UK Biobank traits was provided by the Neale Lab  
242 (<http://www.nealelab.is/>) and the Gene ATLAS (<http://geneatlas.roslin.ed.ac.uk/>) [54]. In this study,  
243 we added to the GWAS-MAP database results from 18 GWAS of chronic musculoskeletal pain-related  
244 traits obtained in the present study (GWAS in the discovery dataset and the results from European  
245 ancestry meta-analysis for chronic back, neck/shoulder, knee, hip pain; GWAS in the discovery dataset  
246 and the results from European ancestry meta-analysis for GIPs constructed for these four phenotypes;  
247 European ancestry meta-analysis of GWAS for chronic stomach/abdominal pain and chronic  
248 headache). Additionally, we added the results of GWAS of osteoarthritis from the Michigan PheWeb  
249 database (<http://pheweb.sph.umich.edu/SAIGE-UKB/pheno/740>). This OA GWAS was performed  
250 using the UK Biobank data by the Scalable and Accurate Implementation of GEneralized mixed model  
251 (SAIGE) method [55].

252 Description of all 2,262 traits is provided in Table S2. The GWAS-MAP platform contains  
253 embedded software for our implementation of SMR/HEIDI analysis [50], LD Score regression [35],  
254 and 2-sample Mendelian randomization analysis (MR-Base package [56]). Further details are given in  
255 Supplementary Methods.

256 In gene expression analysis, the significance threshold for SMR was set at  $P = 3.24e-06$   
257 (0.05/15,445, where 15,445 is the total number of tests corresponding to all analyzed SNPs, expression  
258 probes, and tissues). In complex traits analysis, the significance threshold for SMR was set at  $P =$   
259  $3.71e-06$  (0.05/(6\*2,244), where 6 is the number of loci, and 2,244 is the number of non-pain traits).  
260 The significance threshold for HEIDI tests in both analyses was set at  $P = 0.01$  ( $P < 0.01$  corresponds  
261 to the rejection of pleiotropy hypothesis). Details of data processing are given in Supplementary  
262 Methods.

### 263 ***Genetic correlations and heritability***

264 SNP-captured heritability ( $h^2$ ) and genetic correlations between GIPs and human complex traits  
265 were estimated using LD Score regression [38]. In total, we examined 209 non-UK Biobank traits  
266 available in the LD hub database (<http://ldsc.broadinstitute.org/ldhub/>). We removed duplicates and  
267 included only the most recent study for each trait (as indicated by the largest PubMed ID number).  
268 Since osteoarthritis was not present in the LD hub database, we used summary statistics for this trait  
269 obtained from the Michigan PheWeb database (<http://pheweb.sph.umich.edu/SAIGE-UKB/pheno/740>). The statistical significance threshold was set at  $5.95e-05$  (0.05/(210\*4), where  
270 210 is the number of traits and 4 is the number of GIPs).

272 Genetic correlations between GIPs and LD hub traits were calculated using the LD hub web  
273 interface. Genetic correlations between GIPs, osteoarthritis and chronic pain traits were calculated  
274 using the GWAS-MAP platform.

275 For 39 LD hub traits showing statistically significant correlations with GIP1 as well as for  
276 osteoarthritis, four chronic pain traits and four GIPs, matrices of genetic correlation were generated.  
277 Clustering and visualization were performed by the “corrplot” package for the R language (basic



278 “hclust” function). For clustering, we estimated squared Euclidean distances by subtracting absolute  
279 values of genetic correlation from 1 and used the Ward’s clustering method.

280 Additionally, we estimated the genetic correlation between GIP1 for four analyzed chronic pain  
281 traits and the first GIP constructed using the same methodology for six chronic pain traits (back,  
282 neck/shoulder, knee, hip, stomach/abdominal pain, and headache) using the GWAS-MAP platform.

## 283 **Results**

### 284 ***Overview of the study design***

285 Our study was designed to investigate the genetic components underlying chronic  
286 musculoskeletal pain at four locations: back, neck/shoulder, hip, and knee (Figure 1). Individuals who  
287 reported more than 3 months of pain all over the body were not included in the present study. All  
288 studied pain phenotypes were found to have statistically significant SNP-based heritability (2-4% on  
289 the observed scale, Table S2) and to be genetically correlated with each other (Figure 2c).

290 Using the matrix of genetic covariances between the studied chronic pain traits as estimated from  
291 the discovery cohort, we constructed four genetically independent pain phenotypes (GIP1 to GIP4) in  
292 the discovery and replication cohorts. GIP1, explaining most of the genetic variance and covariance  
293 between the studied pain traits, was of foremost interest in the present research. Nevertheless, we also  
294 considered the remaining GIPs, which are genetically independent contributors to chronic pain at the  
295 four studied sites.

296 For each GIP, GWAS results were obtained. Associations reaching the genome-wide significance  
297 threshold in the discovery cohort were considered replicated if the Bonferroni-corrected significance  
298 threshold was reached in the meta-analysis of replication cohorts. For replicated loci, gene  
299 prioritization was performed using several approaches. We conducted a functional bioinformatics  
300 analysis searching for relevant gene sets and tissues (DEPICT/FUMA analyses), analyzed pleiotropic  
301 effects (SMR/HEIDI analysis) and investigated genetic correlations with other complex traits. *In silico*  
302 functional analysis was performed using the cohort of European ancestry individuals since this  
303 subsample was the largest.

304

305

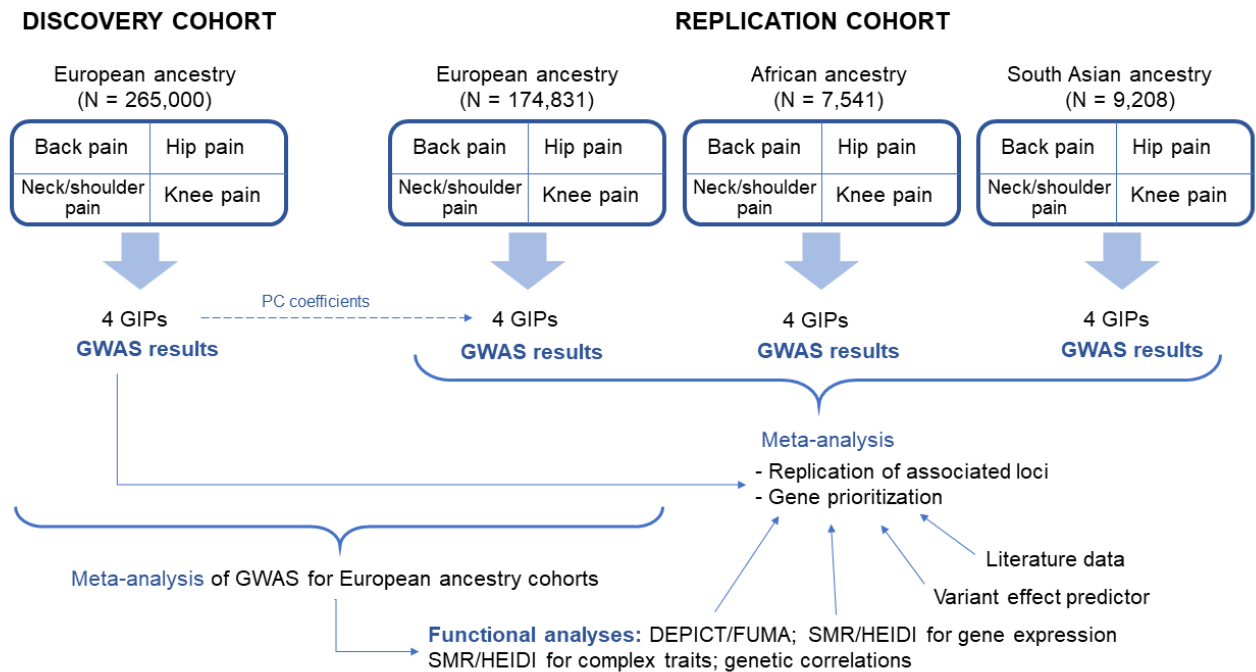

306

307

308

309

310

311

312

313

314

315

316

317

318

319

320

321

322

323

324

325

326

327

328

329

330

331

332

333

**Figure 1.** Overview of the study. European ancestry individuals provided the matrix of genetic covariances and orthogonal transformation coefficients. The four chronic musculoskeletal pain phenotypes were decomposed into four GIPs. Orthogonal transformation coefficients were further used to construct GIPs in the replication cohorts of European, African, and South Asian ancestry individuals. For each GIP, GWAS results were obtained. Replication of associations and *in silico* functional analyses were based on the meta-analyses of GWAS for the replication cohorts and European ancestry cohorts, respectively. For replicated loci, the most likely causal genes were prioritized.

DEPICT, Data-driven Expression Prioritized Integration for Complex Traits framework; GIP, genetically independent phenotype; PC, principal components; SMR/HEIDI, Summary data-based Mendelian Randomization analysis followed by the Heterogeneity in Dependent Instruments test; FUMA, Functional Mapping and Annotation of Genome-Wide Association Studies platform.

### ***Genetically independent phenotypes***

The four original chronic musculoskeletal pain phenotypes were converted into GIPs using the coefficients of orthogonal transformation generated in the principal component analysis based on the matrix of genetic covariances. Coefficients of orthogonal transformation represent contribution of each pain phenotype on each GIP, while genetic variance explained by GIPs approximates contribution of each GIP to each pain phenotype. A graphical representation of orthogonal transformation coefficients, as well as the genetic variance of chronic musculoskeletal pain phenotypes explained by each GIP, is shown in Figures 2a and 2b, respectively.

The contributions of all pain phenotypes to GIP1 had the same direction and approximately the same magnitude. GIP1 showed the best stability based on the narrow 95% confidence intervals of orthogonal transformation coefficients. As expected, GIP1 explained the largest proportion of genetic variance (78.4%) of the four investigated musculoskeletal pain traits (the formula for calculating this value is provided in Supplementary Methods, page 9). SNP-based heritability of GIP1 was 7% and was found to be substantially larger than the heritability of the four individual pain phenotypes (2-4%, Figure 2c).

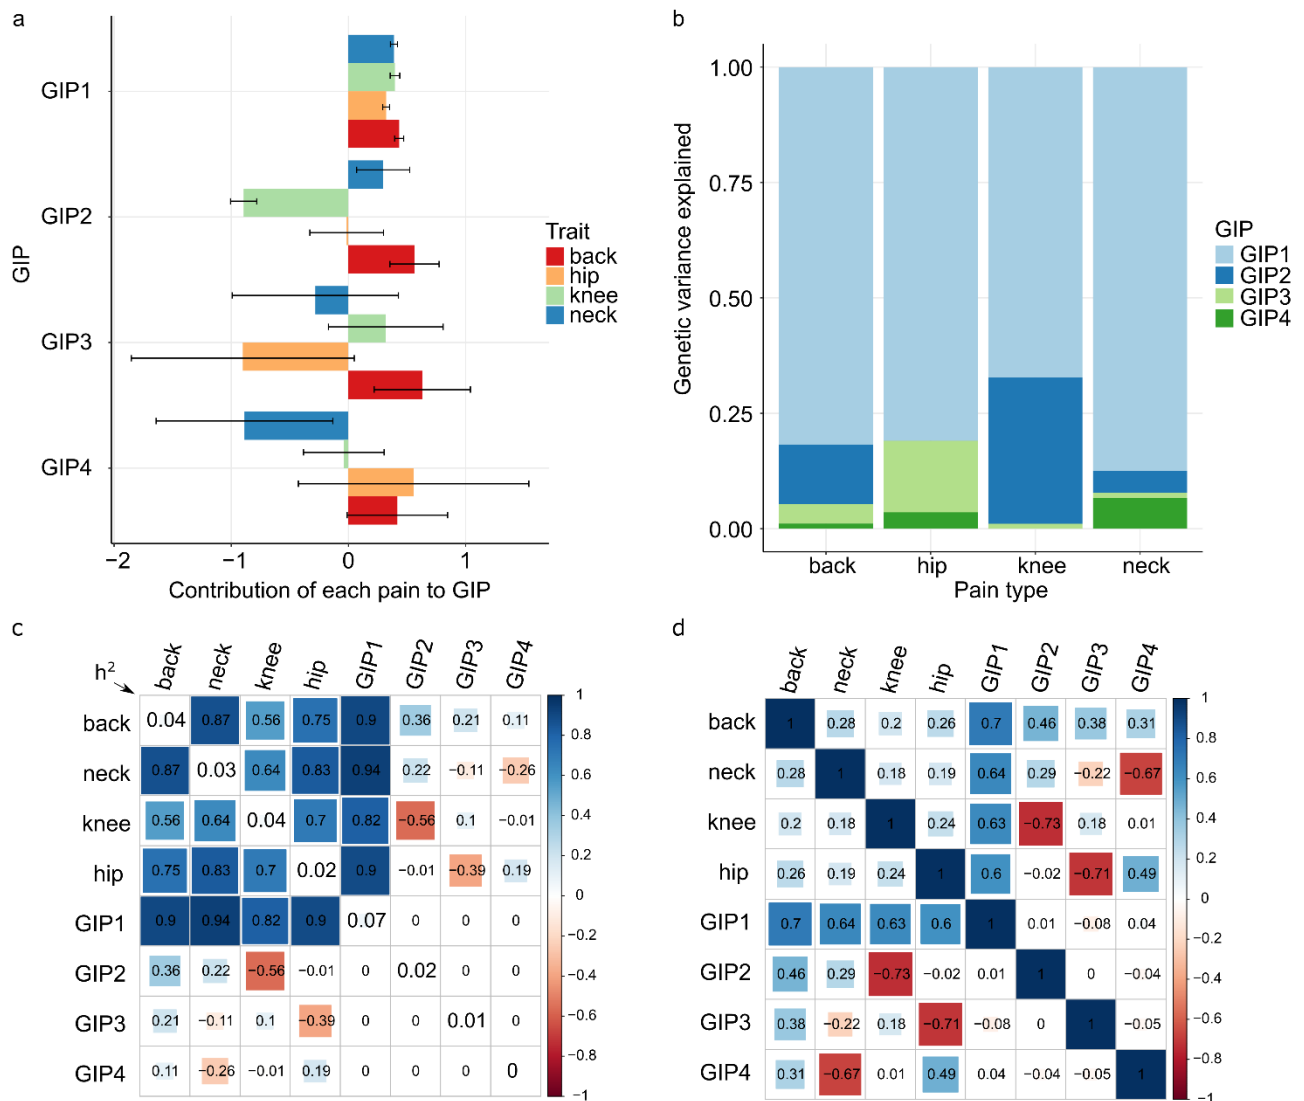

**Figure 2.** Genetically independent phenotypes (GIP) for chronic musculoskeletal pain.

**a.** Barplots depicting the contribution of the four chronic musculoskeletal pain traits to each GIP. The bars represent orthogonal transformation coefficients, and the whiskers indicate their 95% confidence intervals. **b.** Genetic variance of the studied chronic musculoskeletal pain explained by four GIPs. **c.** Estimated matrix of genetic correlations between the four chronic musculoskeletal pain phenotypes and GIPs. The diagonal elements represent estimates of SNP-based heritability ( $h^2$ ) on the observed scale for each trait. **d.** Matrix of phenotypic correlations between the four chronic musculoskeletal pain phenotypes and GIPs (estimated for pain phenotypes and predicted for GIPs). Estimates for **c**, **d** were obtained using the discovery cohort of European ancestry individuals ( $N = 265,000$ ).

### GWAS for genetically independent phenotypes

At the discovery stage, 9 loci passed the study-level threshold of statistical significance set at  $P < 1.3e-08$  ( $5e-08/4$ , where 4 is the number of GIPs) after correction for the LD Score regression intercept (1.016 for GIP1, 1.001 for GIP2, 1.013 for GIP3, and 1.021 for GIP4). Six of the loci were associated with GIP1, and three with GIP2 (Table 1). Conditional and joint analysis showed single association signals per locus (Table S3). Manhattan plots of  $-\log_{10}(P)$  are given in Figure S1, quantile-quantile plots in Figure S2, and regional association plots in Figure S3.

Associations of six loci (five associated with GIP1 and one with GIP2) were replicated at  $P < 5.6e-03$  ( $0.05/9$ , where 9 is the number of loci identified in the discovery stage). Full results of associations with each GIP and studied chronic musculoskeletal pain phenotype are provided in Table S4.

355 Two of the six replicated loci showed genome-wide significant associations with chronic pain at  
356 specific location in the discovery cohort ( $P < 5e-08$ , Table S4). These included the GIP1-associated  
357 locus near the *EXD3* gene (tagged by rs73581580 and associated with chronic back pain) and the GIP2-  
358 associated locus near the *GDF5* gene (tagged by rs143384 and associated with chronic knee pain). In  
359 the meta-analysis of European ancestry discovery and replication cohorts, two additional loci reached  
360 a genome-wide significance for association with pain at specific location: the GIP1-associated locus  
361 near the *SLC39A8* gene (tagged by rs13107325 and associated with chronic neck/shoulder pain) and  
362 the GIP1-associated locus near the *ECM1* gene (tagged by rs3737240 and associated with chronic hip  
363 pain) (Table S4).

364 Functional effects of SNPs rs13107325, rs3737240, and rs143384 and/or their associations with  
365 complex traits and diseases have been described previously (Table S5). In brief, a missense  
366 polymorphism rs13107325 in the divalent cation transporter gene *SLC39A8* is one of the most  
367 pleiotropic variants in the human genome, associated with multiple traits including spine conditions  
368 (Table S5). The allele T, associated with GIP1 in our study, was associated in prior studies with  
369 decreased height, greater spinal curvature, increased risk of severe adolescent idiopathic scoliosis [57],  
370 osteoarthritis [58], Crohn's disease [59], and schizophrenia [60].

371 A missense SNP rs3737240 is located in the *ECM1* (extracellular matrix protein 1) gene encoding  
372 a protein involved in negative regulation of endochondral bone formation and chondrogenesis [61-63].  
373 Previous studies reported association of the variant T allele (or the tightly linked rs13294 A allele ( $r^2$   
374 = 0.97 in European ancestry populations), which is also a missense *ECM1* gene variant), inversely  
375 associated with GIP1 in our study, with the increased risk of ulcerative colitis [64-66]. GIP1-associated  
376 allele rs3737240 C is in high LD with the allele rs12040949 C ( $r^2 = 0.94$  in European ancestry  
377 populations), which showed an association with the increased risk of hip osteoarthritis in a recent  
378 GWAS [58].

379 Polymorphism rs143384 in the 5'-untranslated region of the growth differentiation factor 5 gene  
380 (*GDF5*) is in high LD with rs143383 (rs143384 T allele is positively correlated with rs143383 T allele).  
381 In multiple previous studies, rs143383 T allele was associated with decreased expression of *GDF5* in  
382 the joint [67], increased risk of osteoarthritis [58, 67-71], lumbar disc degeneration [72], and congenital  
383 dislocation of the hip [73, 74]. In our study, association of rs143383 with GIP2 had the same magnitude  
384 of effect as that of rs143384, and also passed the study-level statistical significance threshold  
385 (discovery cohort:  $P = 8.53e-12$  after correction for residual inflation). It should be noted that both  
386 variant alleles (rs143384 T and rs143383 T) were inversely associated with GIP2, consistent with the  
387 negative coefficient of knee pain phenotype observed for GIP2 (Figure 2a).

388  
389

390 **Table 1.** Top SNPs associated with GIPs.

| GIP*        | Lead SNP          | Chr:position**     | RefA/Eff<br>A† | Nearest<br>gene§ | Discovery cohort (N = 265,000) |              |                 |                       |              | Meta-analysis of 3 replication cohorts‡ |              |                 |              |                |
|-------------|-------------------|--------------------|----------------|------------------|--------------------------------|--------------|-----------------|-----------------------|--------------|-----------------------------------------|--------------|-----------------|--------------|----------------|
|             |                   |                    |                |                  | $\beta$                        | SE           | P               | $P^{\ddagger}_{(GC)}$ | EAF          | $\beta$                                 | SE           | P               | EAF          | N              |
| <b>GIP2</b> | <b>rs143384</b>   | <b>20:34025756</b> | <b>C/T</b>     | <i>GDF5</i>      | <b>-0.020</b>                  | <b>0.003</b> | <b>4.87e-13</b> | <b>7.40e-13</b>       | <b>59.8%</b> | <b>-0.022</b>                           | <b>0.003</b> | <b>1.65e-10</b> | <b>58.5%</b> | <b>191,580</b> |
| <b>GIP1</b> | <b>rs7628207</b>  | <b>3:49754970</b>  | <b>T/C</b>     | <i>AMIGO3</i>    | <b>-0.023</b>                  | <b>0.004</b> | <b>1.71e-10</b> | <b>2.37e-10</b>       | <b>82.3%</b> | <b>-0.012</b>                           | <b>0.004</b> | <b>4.92e-03</b> | <b>81.8%</b> | <b>191,580</b> |
| <b>GIP1</b> | <b>rs13107325</b> | <b>4:103188709</b> | <b>T/C</b>     | <i>SLC39A8</i>   | <b>-0.032</b>                  | <b>0.005</b> | <b>8.78e-10</b> | <b>1.19e-09</b>       | <b>92.6%</b> | <b>-0.035</b>                           | <b>0.007</b> | <b>4.21e-08</b> | <b>92.6%</b> | <b>191,580</b> |
| <b>GIP1</b> | <b>rs3737240</b>  | <b>1:150483355</b> | <b>T/C</b>     | <i>ECM1</i>      | <b>0.017</b>                   | <b>0.003</b> | <b>2.01e-09</b> | <b>2.69e-09</b>       | <b>60.4%</b> | <b>0.010</b>                            | <b>0.003</b> | <b>3.17e-03</b> | <b>61.1%</b> | <b>191,580</b> |
| <b>GIP1</b> | <b>rs73581580</b> | <b>9:140251458</b> | <b>G/A</b>     | <i>EXD3</i>      | <b>0.025</b>                   | <b>0.004</b> | <b>3.89e-09</b> | <b>5.15e-09</b>       | <b>12.4%</b> | <b>0.030</b>                            | <b>0.005</b> | <b>9.54e-09</b> | <b>12.3%</b> | <b>174,831</b> |
| <b>GIP1</b> | <b>rs12705966</b> | <b>7:114248851</b> | <b>G/A</b>     | <i>FOXP2</i>     | <b>0.018</b>                   | <b>0.003</b> | <b>5.71e-09</b> | <b>7.52e-09</b>       | <b>66.7%</b> | <b>0.012</b>                            | <b>0.004</b> | <b>1.70e-03</b> | <b>67.2%</b> | <b>191,580</b> |
| GIP2        | rs4985445         | 16:69867835        | G/A            | <i>WWP2</i>      | 0.017                          | 0.003        | 1.56e-09        | 2.09e-09              | 54.3%        | 0.007                                   | 0.003        | 0.0371          | 53.2%        | 191,580        |
| GIP2        | rs548227718       | 5:175902724        | G/A            | <i>FAF2</i>      | -0.283                         | 0.048        | 3.02e-09        | 4.01e-09              | 0.1%         | 0.096                                   | 0.060        | 0.1056          | 0.1%         | 174,831        |
| GIP1        | rs111368900       | 1:53084695         | G/A            | <i>GPX7</i>      | 0.242                          | 0.041        | 5.01e-09        | 6.60e-09              | 0.2%         | 0.089                                   | 0.048        | 6.55e-02        | 0.2%         | 174,831        |

391 Replicated associations are shown in bold. EAF, effect allele frequency; SE, standard error; SNP, single nucleotide polymorphism

392 \*Genetically independent phenotype with which the locus is associated

393 \*\*Chromosome: position on chromosome according to GRCh37.p13 assembly

394 †Reference allele/effective allele

395 §Nearest gene according to the NCBI dbSNP database (<https://www.ncbi.nlm.nih.gov/snp/>)

396 ‡P-value corrected for residual inflation using the LD Score regression intercept

397 ¥Cohorts of individuals of African, South Asian and European ancestry from the UK Biobank (3.9%, 4.8%, and 91.3% in the total replication cohort, N = 191,580)

## 398 ***Functional annotation of the revealed signals***

### 399 *Literature-based gene prioritization*

400 For genes located near the lead SNPs ( $\pm 250$  kb) associated with GIPs, we performed a search  
401 in the Online Mendelian Inheritance in Man database (OMIM, <https://www.omim.org/>), Google  
402 Scholar, the NCBI Gene (<https://www.ncbi.nlm.nih.gov/gene>), and the Pubmed database  
403 (<https://www.ncbi.nlm.nih.gov/pubmed>) to infer whether the biological functions of these genes may  
404 better explain their involvement in chronic musculoskeletal pain. The list of genes in the studied  
405 regions was based on regional association plots (Figure S3) and is given in Table S4. Summary  
406 information on the genes that we considered most likely to be causal (literature data with references  
407 to corresponding sources) is provided in Table S6. In brief, we found 13 genes with plausible roles  
408 in pain phenotypes or related conditions: *GDF5* and *MMP24* (near rs143384), *AMIGO3* and *BSN*  
409 (rs7628207), *SLC39A8* (rs13107325), *MIR6878*, *ECM1* and *CTSS* (rs3737240), *MIR7114*, *NSMF*,  
410 *NOXA1*, and *GRIN1* (rs73581580), and *FOXP2* (rs12705966). Some of these genes have been linked  
411 to neuropathic pain (*MMP24* [75, 76], *CTSS* [77-81], *NOXA1* [82]) and recovery after central nervous  
412 system (CNS) injury (*AMIGO3* [83, 84]). Genes *GDF5* [85, 86], *SLC39A8* [57, 87, 88], *ECM1* [61-  
413 63], *MIR6878* [89], and *MIR7114* [90] were shown to be related to musculoskeletal disorders  
414 (osteoarthritis, ankylosing spondylitis) and/or skeletal development. Other genes (*BSN* [91], *NSMF*  
415 [92, 93], *GRIN1* [94], and *FOXP2* [95, 96]) are involved in nervous system development or synaptic  
416 transmission. In particular, the *FOXP2* gene product is required for proper development of speech  
417 and language regions of the brain during embryogenesis [95, 96].

### 418 *Prediction of SNP effects*

419 Variant Effect Predictor (VEP) identified four missense variants: rs13107325 in the *SLC39A8*  
420 gene, rs3737240 and rs13294 in the *ECM1* gene, and rs79140116 in the *EXD3* gene. SIFT and  
421 PolyPhen tools predicted possibly damaging/deleterious effects only for rs13107325 and rs13294,  
422 while the remaining SNPs were designated as benign/tolerated (Table S7a). Polymorphism  
423 rs13107325 is a triallelic SNP (C>T, A), and possibly damaging effects were predicted for both minor  
424 alleles T and A. Allele A is extremely rare and was not analyzed in the present study. Allele T was  
425 pain-predisposing (and positively associated with GIP1). Polymorphism rs13294 is also a triallelic  
426 SNP (G>A, T) and the extremely rare allele T was not covered by our GWAS. SIFT and PolyPhen  
427 tools predicted possibly damaging/deleterious effects only for the rare T variant, while allele A  
428 (inversely associated with GIP1 in our study) was attributed as benign/tolerated. However, it is still  
429 possible that in the case of a large effect of the rare allele rs13294T on GIP1, lead SNP rs3737240  
430 only tags this rare variant (rs3737240 and rs13294 are located 1.6 kb from each other and are in high  
431 LD,  $r^2 = 0.97$  in European ancestry populations). FATHMM-XF and FATHMM-INDEL identified a  
432 potentially pathogenic intronic SNP rs28535523 in the *UBA7* gene and an intronic indel rs34291892  
433 in the *FOXP2* gene (Tables S7b, c). Potentially pathogenic variants rs28535523 T and rs34291892  
434 insertion A were positively associated with GIP1. Data on matching the possibly  
435 damaging/deleterious/pathogenic alleles with the effects on GIPs, amino acid changes (where  
436 appropriate), and lead SNP alleles are presented in Table S7d.

### 437 *Pleiotropic effects on gene expression*

438 Summary data-based Mendelian Randomization (SMR) analysis followed by the Heterogeneity  
439 in Dependent Instruments (HEIDI) test provided evidence that the same causal SNP in the locus  
440 tagged by rs143384 is associated with GIP2 and the expression of *GDF5*, *UQCC1* and *RP3-47704.16*

441 (the gene encoding long intergenic non-coding RNA) in different tissues including brain caudate basal  
442 ganglia (Table S8). Pleiotropic effects were also found for the locus tagged by rs3737240 associated  
443 with GIP1 and *MRPS21* gene expression in blood, and for the locus tagged by rs7628207 associated  
444 with GIP1 and expression levels of the genes *RBM6*, *FAM212A*, *RNF123* and pseudogene *ACTBP13*  
445 (mainly in nervous tissues). It is likely that the locus tagged by rs7628207 contains regulatory  
446 elements that influence transcription of adjacent genes. Interestingly, *RNF123* gene expression has  
447 been linked to the risk of major depression [97], and major depressive disorders are genetically  
448 correlated with pain [25]. As the *AMIGO3* gene transcript (the CNS-related gene bearing the GIP1-  
449 associated SNP rs7628207 in its intron) was not present among the list of probes analyzed in the  
450 GTEx [52] and Westra projects [51], we could not infer pleiotropy. Other genes found in the  
451 literature-based and SNP effect analyses did not passed thresholds in SMR and HEIDI tests,  
452 signifying that we have no support to claim that their expression is influenced by causal variants  
453 associated with GIPs.

#### 454 *DEPICT gene prioritization*

455 Statistically significant results of DEPICT gene prioritization (FDR < 0.05) were observed only  
456 for GIP1 and only when the *P*-value threshold for input SNPs was set at 1e-05. The list of prioritized  
457 genes is provided in Table S9a. Of the genes identified in previous analyses only *BSN* and *FOXP2*  
458 were found to be prioritized by DEPICT.

#### 459 *Summary of gene prioritization*

460 A summary list of prioritized genes is presented in Table 2. For each locus tagged by rs143384,  
461 rs13107325, rs3737240, and rs12705966, two or more lines of evidence support a role for *GDF5*,  
462 *SLC39A8*, *ECM1*, and *FOXP2* genes, respectively, providing solid ground for their prioritization.  
463 Single candidate genes could not be suggested for loci tagged by rs7628207 and rs73581580 since  
464 different approaches yielded different results. The nearest gene to rs7628207 is *AMIGO3*, which has  
465 been shown to participate in inhibition of axon regeneration in the damaged CNS [83, 84]. Five more  
466 genes are present in this region that were prioritized by *in silico* methods and/or based on prior  
467 literature data (in particular, the *BSN* gene encoding Bassoon presynaptic cytomatrix protein). Lead  
468 SNP rs73581580 is located in the intron of the *EXD3* gene, an ortholog of *C. elegans* *mut-7* gene  
469 required for transposon silencing and RNA interference in that organism. Nevertheless, results from  
470 other studies suggest four genes with more plausible effects on chronic musculoskeletal pain  
471 (*MIR7114* [90], *NOXA1* [82], *NSMF* [92, 93], and *GRIN1* [94], Table S6).

472

473

474 **Table 2.** Summary of gene prioritization.

| Lead SNP   | Locus*      | GIP** | Number of genes in the locus† | Prioritized gene | Nearest gene, yes/no (lead SNP location) | Evidence for prioritization |
|------------|-------------|-------|-------------------------------|------------------|------------------------------------------|-----------------------------|
| rs143384   | 20:34025756 | GIP2  | 15                            | <b>GDF5</b>      | yes (5' UTR)                             | L, S                        |
| rs7628207  | 3:49754970  | GIP1  | 18                            | <i>AMIGO3</i>    | yes (intronic)                           | L                           |
|            |             |       |                               | <i>BSN</i>       | no                                       | L, D                        |
|            |             |       |                               | <i>RBM6</i>      | no                                       | S                           |
|            |             |       |                               | <i>FAM212A</i>   | no                                       | S                           |
|            |             |       |                               | <i>RNF123</i>    | no                                       | S                           |
|            |             |       |                               | <i>UBA7</i>      | no                                       | V                           |
| rs13107325 | 4:103188709 | GIP1  | 3                             | <b>SLC39A8</b>   | yes (missense)                           | L, V                        |
| rs3737240  | 1:150483355 | GIP1  | 19                            | <b>ECM1</b>      | yes (missense)                           | L, V                        |
| rs73581580 | 9:140251458 | GIP1  | 32                            | <i>MIR7114</i>   | no                                       | L                           |
|            |             |       |                               | <i>NSMF</i>      | no                                       | L                           |
|            |             |       |                               | <i>NOXA1</i>     | no                                       | L                           |
|            |             |       |                               | <i>GRIN1</i>     | no                                       | L                           |
| rs12705966 | 7:114248851 | GIP1  | 2                             | <b>FOXP2</b>     | yes (intronic)                           | L, V, D                     |

475 Genes with strong evidence for prioritization are indicated in bold.

476 D, DEPICT analysis; L, literature-based prioritization (see Table S6); S, SMR/HEIDI analysis; V, Variant  
477 Effect Predictor/FATHMM analysis; UTR, untranslated region

478 \*Chromosome: position on chromosome according to GRCh37.p13 assembly

479 \*\*Genetically independent phenotype with which the locus is associated

480 †Calculated based on regional association plots generated with LocusZoom tool (<http://locuszoom.org/>) in a  
481 500 kb window ( $\pm 250$  kb around the lead SNP, Figure S3)

#### 482 **Gene set and tissue/cell type enrichment**

483 DEPICT gene set and tissue/cell type enrichment analyses provided statistically significant  
484 results only for GIP1 (Table S9c-f). For SNP sets associated with GIP1 with  $P < 5e-08$ , tissue/cell  
485 type enrichment with FDR  $< 0.05$  was found for two terms: the “Neural Stem Cells” cell type and  
486 “Retina” tissue. However, relaxing the significance threshold of input SNPs to  $P < 1e-05$  led to  
487 identification of 24 additional tissues, all of which were related to CNS. The same pattern was  
488 observed for gene set enrichment (for SNPs with  $P < 1e-05$ ), revealing 462 terms mainly involved in  
489 nervous system function, development and morphology (e.g. “regulation of nervous system  
490 development”, “axonogenesis”, “synapse”, “regulation of transmission of nerve impulse”).

491 FUMA gene set and tissue enrichment analyses for GIP1 detected 9 gene categories (6 of them  
492 were nervous system-related) and 12 brain tissues, respectively (Table S10, Figure S4). For GIP2 and  
493 GIP3, a total of three gene sets were found by FUMA analysis, although we considered them as non-  
494 specific (e.g. “nikolsky\_breast\_cancer\_20q11\_amplicon”; Table S10). No statistically significant  
495 gene sets were revealed for GIP4, and no statistically significant tissue types were identified for GIP2,  
496 GIP3, and GIP4.

#### 497 **Pleiotropic effects on complex traits**

498 Five out of six replicated loci demonstrated pleiotropic effects on human complex traits in the  
499 SMR/HEIDI analysis (Table S11, Figure 3). As expected, the GIP1-associated locus rs13107325  
500 (known as one of the most pleiotropic variants of the genome) was associated with the greatest  
501 number of diverse phenotypes, which included anthropometric traits (weight, height, and BMI), fluid  
502 intelligence score, prospective memory and education, sleep duration, Crohn's disease, self-reported  
503 osteoarthritis, diastolic blood pressure, blood cell traits, and alcohol intake frequency. Traits linked



504 with the GIP2-associated locus rs143384 were mainly related to anthropometry and knee-related  
505 conditions (gonarthrosis and internal derangement of knee). The locus tagged by the missense SNP  
506 rs3737240 (*ECMI* gene) showed pleiotropic effects on platelet count and plasma level of extracellular  
507 matrix protein 1 (ECM1) measured with the SOMAscan platform [98]. The same pain-promoting  
508 allele in this locus that was positively associated with GIP1 was linked to an increase in ECM1 level,  
509 reinforcing the role of *ECMI* as the candidate in this region. In the locus tagged by rs73581580, GIP1-  
510 associated alleles were linked to higher frequency of tiredness and difficulty of getting up in the  
511 morning. In the locus tagged by rs7628207, GIP1-associated variants were related to decreased  
512 plasma level of thioredoxin domain-containing protein 12 (TXNDC12), decreased overall health  
513 rating, decreased age at first live birth, decreased educational attainment, increased basal metabolic  
514 rate, and increased hip circumference. Interestingly, rs7628207 is adjacent to the *AMIGO3* gene  
515 prioritized by us based on the literature data (Table 2, Table S6) which is linked to the gene encoding  
516 *TXNDC12* via a trans-protein QTL rs4688759 [99].

517 Hospital-diagnosed osteoarthritis (the UK Biobank trait for which GWAS summary statistics  
518 was downloaded from the Michigan PheWeb database, see Methods section) was not revealed in the  
519 SMR/HEIDI analysis for any of the analyzed loci. However, for rs13107325, rs3737240, and  
520 rs143384, we can speculate that this could be due to the limited statistical power of the analysis. The  
521 SMR test  $P$ -values for these loci were quite low, although did not reach the Bonferroni-corrected  
522 significance threshold of  $P = 3.71e-06$  (rs13107325:  $P_{SMR} = 1.14e-05$ ,  $\beta_{SMR} = 0.63$ ; rs3737240:  
523  $P_{SMR} = 1.68e-05$ ,  $\beta_{SMR} = 0.89$ ; rs143384:  $P_{SMR} = 6.13e-04$ ,  $\beta_{SMR} = -0.40$ ;  $P_{HEIDI} \geq 0.01$  for all  
524 these loci). Thus, we cannot rule out a hypothesis that the same causal SNPs within the loci tagged  
525 by rs13107325 and rs3737240 may be associated with GIP1 and the increased risk of osteoarthritis,  
526 and the same causal SNPs within the locus tagged by rs143384 can be associated with GIP2 and the  
527 decreased risk of osteoarthritis.

528

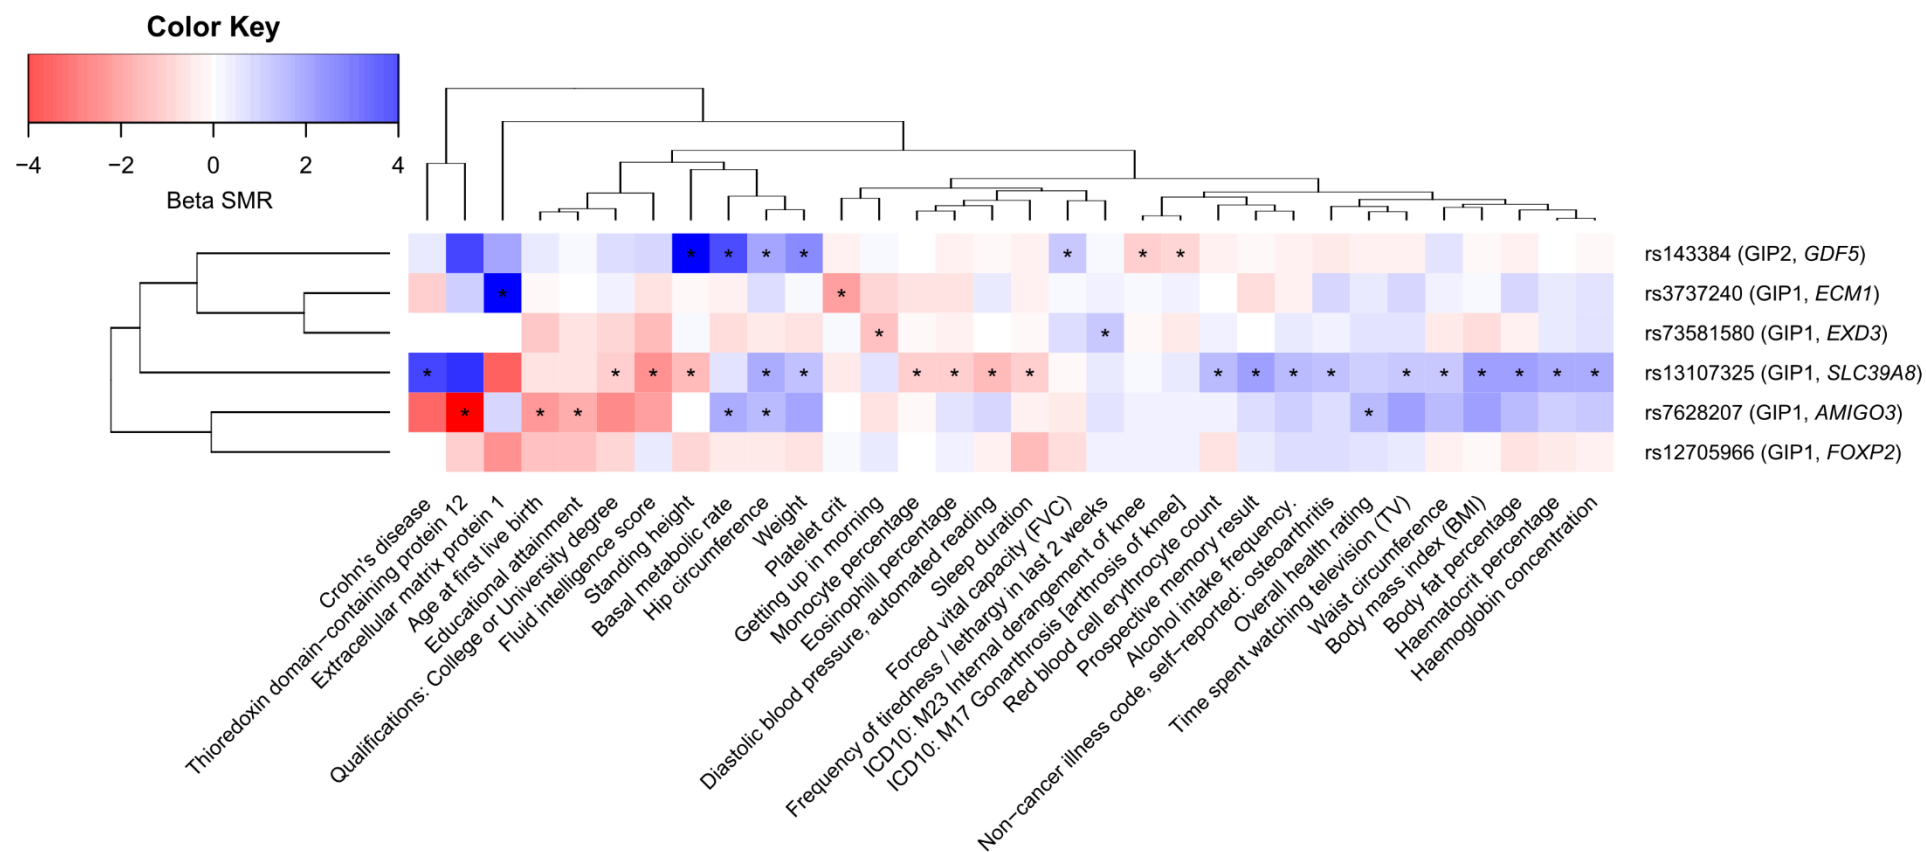

530  
531 **Figure 3.** Pleiotropic effects of identified loci on human complex traits.

532 Color depicts the sign and the magnitude of SMR beta coefficient. Negative sign (red) means opposed effects on the corresponding GIP and the trait,  
533 and positive sign (blue) means the same direction of effect.  $|\text{beta SMR}| > 4$  are depicted as  $|\text{beta SMR}| = 4$ . For “Prospective memory result” and “Overall  
534 health rating” trait, high scores correspond to poor performance. For “Getting up in morning” trait, high score corresponds to easy getting up. Traits that  
535 passed both SMR and HEIDI tests ( $P_{\text{SMR}} < 3.71\text{e-}06$  and  $P_{\text{HEIDI}} \geq 0.01$ ) are marked with an asterisk. Data on 45 out of 78 revealed traits are not shown.  
536 Full results are given in Table S11. GIPs associated with the loci and genes nearest to lead SNPs are indicated in parentheses. Dendrograms represent  
537 clustering based on complete linkage hierarchical clustering method.

538 ***Genetic correlations between GIPs and complex traits***

539 GIP1 showed statistically significant genetic correlations with 40 complex traits (Table S12a,  
540 Figure 4). Among them, 11 traits were directly linked to excess weight (BMI, overweight, obesity,  
541 waist circumference), that is in line with known epidemiological associations between chronic pain  
542 and obesity-related traits [100]. Five more traits fell in the same cluster: HDL cholesterol (negative  
543 correlation with GIP1), triglycerides, HOMA-IR, leptin, and fasting insulin. Strong genetic  
544 correlations ( $|r_g|$  ranging between 0.31 and 0.54) were also revealed between GIP1 and the cluster of  
545 psychiatric/personality traits (major depressive disorder, depressive symptoms, subjective well-  
546 being, and neuroticism). This finding is in accord with previous twin and family studies  
547 demonstrating a common genetic background for pain and depression [101-103]. Other traits included  
548 sociodemographic, reproductive, education-related and smoking-related traits, osteoarthritis,  
549 rheumatoid arthritis, coronary artery disease, and sleep duration.

550 Traits that displayed the strongest genetic correlations with GIP1 were osteoarthritis ( $r_g = 0.65$ ),  
551 age of first birth ( $r_g = -0.56$ ), depressive symptoms ( $r_g = 0.54$ ), and college completion ( $r_g = 0.54$ ).  
552 Overall, the pattern of genetic correlations with GIP1 was very similar to that observed for back pain  
553 in our previous study [104]. GIP2 was genetically correlated only with osteoarthritis (inverse genetic  
554 correlation,  $r_g = -0.30$ ) and obesity-related traits, and GIP4 only with hip circumference. No  
555 statistically significant genetic correlations with complex traits were found for GIP3 (Table S12 b-d).

556 Furthermore, we analyzed the genetic correlation between GIP1 and the first GIP constructed  
557 using the same methodology for a broader range of chronic pain traits (back, neck/shoulder, knee,  
558 hip, stomach/abdominal pain, and headache). We found out that these GIPs were almost genetically  
559 equivalent ( $r_g = 0.99$ ).

560



571 **Discussion**

572 The genetic control of chronic musculoskeletal pain is complex, with each of very many genetic  
573 variants contributing a small effect. As a result, even very large genome-wide association studies  
574 provide only a limited number of replicated loci and rather low SNP-based heritability. Evidence  
575 from recent studies indicates that pain at different anatomical sites shares a common genetic  
576 component [24-26]. This suggests that combining several pain phenotypes in a single analytical  
577 framework may facilitate the discovery of common genetic factors – chronic musculoskeletal pain  
578 genes and pathways.

579 In the present study, we applied an approach that allowed us to detect genes shared between  
580 four common chronic musculoskeletal pains: back, neck/shoulder, knee and hip. Our approach relies  
581 on capturing heredity of a set of genetically correlated traits via constructing genetically independent  
582 phenotypes (GIPs) (Figure 2a). The GIPs are defined as a weighted sum of the original phenotypes,  
583 with weights selected in such a way that the first GIP (GIP1) explains most genetic variance of and  
584 covariance between the studied traits, with the later GIPs (GIP2-4) explaining progressively less. The  
585 four weights defining GIP1 based on the four chronic pain traits (back, neck/shoulder, hip, and knee  
586 pain) turned out to be approximately the same (Figure 1a). This means that GIP1, the genetic  
587 component explaining most of the cases of chronic musculoskeletal pain at the studied sites, affects  
588 the risk of chronic musculoskeletal pain to approximately the same degree, irrespective of pain's  
589 location. Unlike the first GIP, the second GIP is site-specific and reflects a genetic propensity for  
590 knee pain, but not the back or neck/shoulder pain.

591 We mapped and replicated six genomic loci (five associated with GIP1 and one with GIP2).  
592 Importantly, in the discovery sample, only two out of six replicated loci were genome-wide  
593 significantly associated with the individual pain phenotypes: rs73581580 with chronic back pain and  
594 rs143384 with chronic knee pain. Also, as expected, the SNP-based heritability of GIP1 was  
595 substantially higher than for any of separate pain traits (7% vs 2-4%). These results highlight the  
596 improved power of the GIP approach for identifying genetic predictors of chronic pain predisposition.  
597 It should be noted that phenotypic correlations between the traits were much lower than the genetic  
598 correlations (Figure 2c, d; pairwise phenotypic correlations ranged from 0.18 to 0.28, while pairwise  
599 genetic correlations ranged from 0.56 to 0.87). In this scenario, we can speculate that conventional  
600 multivariate approaches based on phenotypic correlations like MANOVA [105] or MultiPhen [106]  
601 would have been less powerful than our method based on genetic correlations. Moreover, while  
602 estimation of phenotypic correlation is impossible for non-overlapping samples, genetic correlations  
603 can be calculated for both overlapping samples and independent cohorts [38]. This makes our  
604 approach applicable to the traits measured within the frameworks of different genomics consortia.

605 Among the six replicated loci, three were well-studied polymorphisms associated with different  
606 traits and conditions in previous works (rs13107325, rs3737240 and rs143384, Table S5). In the  
607 present study, we performed a hypothesis-free analysis of pleiotropic effects of six GIP-associated  
608 loci on 2,243 complex human traits. Our analysis revealed 78 phenotypes influenced by the same  
609 causal polymorphisms that are associated with GIPs (Table S11, Figure 3). These phenotypes  
610 included a broad variety of anthropometric, sociodemographic, behavior and personality traits,  
611 diseases (such as Crohn's disease, gonarthrosis and osteoarthritis), and laboratory parameters.  
612 Interestingly, GIP1-associated alleles in the locus tagged by rs73581580 were also associated with  
613 higher frequency of tiredness and difficulty of getting up in the morning. Our results demonstrate

614 diversity of effects of the GIP-associated loci and suggest the presence of common pathways  
615 underlying chronic musculoskeletal pain and multiple other human traits.

616 GIP1-associated pathways and tissues were mostly related to CNS development and  
617 functioning, suggesting that GIP1 depicts neurological and psychological components of chronic  
618 pain. Consistent with this, one of the genes prioritized for GIP1-associated loci based on multiple  
619 lines of evidence was *FOXP2*, whose product is a transcription factor expressed in fetal and adult  
620 brain and required for the development of speech and language regions [95, 96]. Involvement of  
621 psychological component in chronic pain was additionally supported by the finding of a very strong  
622 positive genetic correlation between GIP1 and depressive symptoms. Having said that, it is equally  
623 important that GIP1 was associated also with traits reflecting general health and risk factors for  
624 musculoskeletal pain: sociodemographic, reproductive, education- and smoking-related traits, and  
625 sleep duration. Importance of morphological factors for chronic musculoskeletal pain was also  
626 demonstrated by revealing of GIP1-associated genes *SLC39A8* and *ECM1*, which are known to be  
627 implicated in the development and functioning of the musculoskeletal system. *ECM1* gene encodes a  
628 negative regulator of bone mineralization and chondrogenesis [61-63]. GIP1-associated (“pain-  
629 promoting”) variant in this gene showed an association with the increased level of ECM1 protein in  
630 our SMR/HEIDI analysis. GIP1-associated *ECM1* allele rs3737240 C is in a high LD ( $r^2 = 0.94$  in  
631 European ancestry populations) with the allele rs12040949 C, which was associated with the  
632 increased risk of hip osteoarthritis in a recent study [58]. The product of the *SLC39A8* gene was  
633 shown to participate in osteoarthritis cartilage destruction [87, 88]. *Slc39a8* mutant zebrafish exhibit  
634 vertebral abnormalities, impaired growth, and decreased motor activity, and a missense GIP1-  
635 associated polymorphism rs13107325 in the *SLC39A8* gene has previously been associated with the  
636 increased risk of osteoarthritis [58] and severe adolescent idiopathic scoliosis [57]. Thus, similar to  
637 findings from our recent study of back pain [104], genetic factors underlying chronic musculoskeletal  
638 pain comprise biological, social and psychological components.

639 Since our study was aimed at investigating chronic musculoskeletal pains at anatomical sites  
640 commonly affected by osteoarthritis, it was not surprising that we found loci and genes associated  
641 with this condition and found high genetic correlation between osteoarthritis and GIP1 ( $rg = 0.65$ ).  
642 Note, that this genetic correlation is similar in magnitude to correlation between GIP1 and age of first  
643 birth (-0.56), indicating that although similarities are high, there exist substantial differences between  
644 OA and GIP1. Furthermore, for GIP1, gene/tissue enrichment analysis revealed a plethora of CNS-  
645 related terms. In a recent large-scale genetic study for OA, enriched terms were not directly linked to  
646 the nervous system (“anatomical structure morphogenesis”, “ion channel transport”, “histidine  
647 metabolism”, etc.) [58]. Finally, we performed genetically independent phenotype analysis for the  
648 extended set of chronic traits, which include not only musculoskeletal pain (six traits: back,  
649 neck/shoulder, knee, hip pain as well as stomach/abdominal pain and headache). Genetic correlation  
650 between GIP1 for four pain traits and GIP1 for six pain traits was extremely high ( $rg = 0.99$ ) providing  
651 strong evidence that, despite high genetic overlap with OA, GIP1 for musculoskeletal pain likely  
652 reflects chronic pain *per se*.

653 It is noteworthy that pain is the main symptom and clinical outcome of osteoarthritis. In the UK  
654 Biobank study which provided GWAS summary statistics for OA [55], phenotypes were defined  
655 according to ICD-9/ICD-10 codes (electronic medical record data), so whether the study participants  
656 were examined radiographically or not is unknown. Thus, genetic overlap between GIP1 and OA can

657 be actually biased by a genetic correlation between GIP1 and not the OA, but pain in OA. Besides  
658 this, a study by Valdes et al. [107] obtained interesting results on the inverse relationship between  
659 preoperative radiographic severity and postoperative pain in OA patients who have undergone total  
660 joint replacement (TJR). The authors hypothesized that in OA patients with low preoperative  
661 radiographic damage, pain leading to TJR can be caused not entirely by a joint damage, but also by  
662 other factors such as central sensitization. It is possible that these factors have common genetic  
663 background with GIP1 constructed in our study.

664 Given that GIP1 essentially contrasts chronic musculoskeletal pain (in general) with an  
665 unpainful state, the other GIPs might be expected to account for musculoskeletal pain at specific  
666 anatomical locations. This was indeed the case with GIP2, which had the greatest impact on knee  
667 pain (Figure 2b). The only gene found to be associated with GIP2 at the genome-wide significance  
668 level was *GDF5*, a gene with well-established associations with peripheral osteoarthritis and  
669 intervertebral disc degeneration [58, 67-72]. These results are consistent with the fact that the knee  
670 is one of the most common sites of osteoarthritis. For GIP3 and GIP4, no firm conclusions can be  
671 drawn regarding what component of pain they might represent, but, as can be seen from Figure 2b,  
672 GIP3 makes a substantial contribution to hip pain and GIP4 to neck/shoulder pain.

673 Another approach recently applied in GWAS of chronic pain is based on obtaining a phenotype  
674 of multisite chronic pain (MCP) as a sum of the number of anatomical sites affected by pain (a study  
675 by Johnston et al. [108]). The MCP phenotype may seem similar to our GIP1 trait at first glance;  
676 however, an important potential drawback of the MCP approach is that it mixes up phenotypes that  
677 do not necessarily have the same genetic background. The summing of different pain sites into a  
678 quantitative MCP phenotype assumes equivalence between the genetic predictors of musculoskeletal  
679 pain conditions (such as back and knee pain) and the genetic predictors of non-musculoskeletal pain  
680 conditions that may include substantial components of pain due to other causes, such as migraine (in  
681 the case of headache), dental or neuropathic pain (in the case of facial pain), or visceral pain (in the  
682 case of stomach/abdominal pain). Such equivalence may be too strong an assumption to make without  
683 empirical justification. Our approach is empirical, with definition of GIPs driven by the data; another  
684 strength of our approach is its ability to reveal pain type specific genetic loci as exemplified by *GDP5*  
685 associated with GIP2 representing knee pain. Comparing with a direct knee pain GWAS, GIP2 may  
686 provide a more knee-specific phenotype from which general propensity to pain is subtracted. This  
687 claim requires experimental validation, though.

688 Nevertheless, our study, together with that by Johnston et al. [108], is among the first to use a  
689 GWAS framework to address the genetics of chronic pain at multiple sites. Despite the difference in  
690 methodology and the phenotypes involved, our study identified five loci also reported by Johnston et  
691 al.: *AMIGO3* (tagged by rs7628207 in [108]), *SLC39A8* (tagged by rs13135092 in [108]), *ECM1*  
692 (tagged by rs59898460 in [108]), *EXD3* (tagged by rs73581580 in both [108] and our study), and  
693 *FOXP2* (tagged by rs12537376 in [108]). It should be noted that in our study, in contrast to the study  
694 by Johnston et al., these loci have been replicated. However, both discovery and replication stages in  
695 our study as well as analyses conducted by Johnston et al. were based on the UK Biobank data only,  
696 highlighting the need to replicate these findings in independent cohorts.

697 Our study has limitations. The first general limitation is related to a questionnaire-based  
698 approach to phenotyping, which may lead to heterogeneous pain phenotypes. Our methods attempted  
699 to overcome this by constructing genetically independent phenotypes whose genetic basis

700 approximates the genetic background of distinct phenotypes and likely represents the “general pain”  
701 component of analyzed musculoskeletal pain traits. Second, in our study, we focused only on chronic  
702 musculoskeletal pain at anatomical sites potentially linked through osteoarthritis, so one must be  
703 cautious generalizing our results to other chronic pain conditions. Third, even though we carried out  
704 replication analysis, the replication cohorts were drawn from the same source dataset (UK Biobank),  
705 so sampling bias cannot be excluded. Finally, for two out of six identified loci (tagged by rs7628207  
706 and rs73581580), we were not able to prioritize a single causal gene, and candidate genes suggested  
707 for the locus tagged by rs73581580 were selected based only on data from available literature sources.

708 In summary, our study of genetically independent components of chronic musculoskeletal pain  
709 phenotypes revealed hereditary factors shared by chronic back, neck/shoulder, hip, and knee pain and  
710 identified loci and genes relevant for these conditions. Our results provided further support that  
711 neurological and psychological components are important contributors to chronic pain. Using this  
712 approach may facilitate discovery of chronic pain mechanisms.

713

714

715



716           **Acknowledgements**

717

718           **Funding**

719   The work of YSA and SZS was supported by by the Russian Ministry of Education and Science under  
720   the 5-100 and by the Federal Agency of Scientific Organizations via the Institute of Cytology and  
721   Genetics (project 0324-2019-0040). The work of YAT, ASSh, and EEE was supported by the Russian  
722   Foundation for Basic Research (project 19-015-00151). The contribution of LCK was funded by  
723   PolyOmica. Dr. Suri was supported by VA Career Development Award # 1IK2RX001515 from the  
724   United States (U.S.) Department of Veterans Affairs Rehabilitation Research and Development  
725   (RR&D) Service. Dr. Suri is a Staff Physician at the VA Puget Sound Health Care System. The  
726   contents of this work do not represent the views of the U.S. Department of Veterans Affairs or the  
727   United States Government.

728

729           **Author contributions**

730   YSA, FMKW, and PS and conceived and oversaw the study. YAT, MBF, ASSh, YSA, FMKW, and  
731   PS contributed to the design of the study and interpretation of the results. YAT, MBF, SZS, and EEE  
732   carried out statistical analysis. ASSh performed literature analysis and literature-based gene  
733   prioritization and produced the first draft of the manuscript. LCK provided statistical and  
734   computational support. All co-authors discussed the results and contributed to preparing the final  
735   version of the manuscript.

736

737           **Conflict of interest**

738   YSA is a founder and co-owner of Maatschap PolyOmica and PolyKnomics BV, private  
739   organizations, providing services, research and development in the field of computational and  
740   statistical, quantitative and computational (gen)omics.

741

## 742                    **Supplementary Table Legends**

- 743    **Table S1.** Descriptive characteristics of the study cohorts.  
744    **Table S2.** Description of traits included in the GWAS-MAP database.  
745    **Table S3.** Results of conditional and joint analysis.  
746    **Table S4.** Top loci associated with GIPs at a study-level threshold of statistical significance ( $P < 1.25e-08$ ).  
747    **Table S5.** Literature data on well-studied SNPs associated with GIP1 and GIP2.  
748    **Table S6.** Gene prioritization based on a literature review.  
749  
750    **Table S7a.** Results of the VEP analysis.  
751    **Table S7b.** Results of the FATHMM-XF analysis for SNPs.  
752    **Table S7c.** Results of the FATHMM-INDEL analysis for indels.  
753    **Table S7d.** Matching alleles with predicted detrimental effects with their effects on GIPs and with lead SNP  
754    alleles.  
755    **Table S7e.** SNP set for the VEP and FATHMM analyses.  
756  
757    **Table S8a.** Results of SMR/HEIDI analysis. Searching for pleiotropic effects on GIPs and gene expression.  
758    Associations that passed both SMR and HEIDI analyses ( $P_{SMR} < 3.24e-06$  and  $P_{HEIDI} \geq 0.01$ ).  
759    **Table S8b.** Results of SMR/HEIDI analysis. Searching for pleiotropic effects on GIPs and gene expression.  
760  
761    **Table S9a.** GIP1. Results of DEPICT analysis for SNPs with  $P < 1e-05$ . Gene prioritization.  
762    **Table S9b.** GIP1. Results of DEPICT analysis for SNPs with  $P < 5e-08$ . Gene prioritization.  
763    **Table S9c.** GIP1. Results of DEPICT analysis for SNPs with  $P < 1e-05$ . Tissue enrichment analysis.  
764    **Table S9d.** GIP1. Results of DEPICT analysis for SNPs with  $P < 5e-08$ . Tissue enrichment analysis.  
765    **Table S9e.** GIP1. Results of DEPICT analysis for SNPs with  $P < 1e-05$ . Gene set enrichment analysis.  
766    **Table S9f.** GIP1. Results of DEPICT analysis for SNPs with  $P < 5e-08$ . Gene set enrichment analysis.  
767  
768    **Table S10.** Statistically significant results of gene set enrichment analysis conducted using the FUMA  
769    platform.  
770    **Table S11.** Results of SMR/HEIDI analysis. Searching for pleiotropic effects on GIPs and other complex  
771    traits. Associations that passed both SMR and HEIDI analyses ( $P_{SMR} < 3.71e-06$  and  $P_{HEIDI} \geq 0.01$ ).  
772  
773    **Table S12a.** Genetic correlations between GIP1 and human complex traits.  
774    **Table S12b.** Genetic correlations between GIP2 and human complex traits.  
775    **Table S12c.** Genetic correlations between GIP3 and human complex traits.  
776    **Table S12d.** Genetic correlations between GIP4 and human complex traits.  
777  
778

## 779                    **Supplementary Figure Legends**

- 780    **Figure S1.** Graphical summary of the discovery GWAS stage after the genomic control correction using LD  
781    Score regression intercept.  
782    **Figure S2.** Quantile-quantile plots for observed vs. expected distribution of P-values for  $\chi^2$  statistics.  
783    **Figure S3.** Regional association plots of  $-\log_{10}(P)$  for SNPs located at the distance of  $\leq 250$  kb from lead  
784    SNPs.  
785    **Figure S4.** Results of tissue enrichment analysis for GIP1 performed using the FUMA platform  
786    **Figure S5.** Matrix of genetic correlations between GIPs, chronic musculoskeletal pain traits and hospital-  
787    diagnosed osteoarthritis (the UK Biobank trait for which GWAS summary statistics was downloaded from the  
788    Michigan PheWeb database, <http://pheweb.sph.umich.edu/SAIGE-UKB/pheno/740>).  
789

- 790           **References**
- 791   1.    Breivik H, Collett B, Ventafridda V, Cohen R, Gallacher D. Survey of chronic pain in  
792       Europe: Prevalence, impact on daily life, and treatment. *Eur J Pain*. 2006;10: 287–287.  
793       doi:10.1016/j.ejpain.2005.06.009
- 794   2.    Saxena AK, Jain PN, Bhatnagar S. The prevalence of chronic pain among adults in India.  
795       *Indian J Palliat Care*. 2018;24: 472–477. doi:10.4103/IJPC.IJPC\_141\_18
- 796   3.    Jackson T, Thomas S, Stabile V, Han X, Shotwell M, McQueen K. Prevalence of chronic  
797       pain in low-income and middle-income countries: a systematic review and meta-analysis.  
798       *Lancet*. 2015;385: S10. doi:10.1016/S0140-6736(15)60805-4
- 799   4.    Crofford LJ. Chronic pain: Where the body meets the brain. *Trans Am Clin Climatol Assoc*.  
800       2015;126: 167–183.
- 801   5.    Dieppe P. Chronic musculoskeletal pain. *BMJ*. 2013;346: f3146. doi:10.1136/bmj.f3146
- 802   6.    Cimmino MA, Ferrone C, Cutolo M. Epidemiology of chronic musculoskeletal pain. *Best*  
803       *Pract Res Clin Rheumatol*. 2011;25: 173–183. doi:10.1016/j.berh.2010.01.012
- 804   7.    Bergman S, Herrström P, Högström K, Petersson IF, Svensson B, Jacobsson LT. Chronic  
805       musculoskeletal pain, prevalence rates, and sociodemographic associations in a Swedish  
806       population study. *J Rheumatol*. 2001;28: 1369–1377.
- 807   8.    Nakamura M, Toyama Y, Nishiwaki Y, Ushida T. Prevalence and characteristics of chronic  
808       musculoskeletal pain in Japan. *J Orthop Sci*. 2011;16: 424–432. doi:10.1007/s00776-011-  
809       0102-y
- 810   9.    Vos T, Allen C, Arora M, Barber RM, Bhutta ZA, Brown A, et al. Global, regional, and  
811       national incidence, prevalence, and years lived with disability for 310 diseases and injuries,  
812       1990–2015: a systematic analysis for the Global Burden of Disease Study 2015. *Lancet*.  
813       2016;388: 1545–1602. doi:10.1016/S0140-6736(16)31678-6
- 814   10.   Freidin MB, Lauc G, Allegri M, Primorac D, Williams FM. Using omics in chronic pain  
815       conditions to delineate mechanisms and provide new therapeutic strategies. *Pain Manag*.  
816       2016;6: 211–215. doi:10.2217/pmt.16.2
- 817   11.   Scholz J. Mechanisms of chronic pain. *Mol Pain*. 2014;10: O15. doi:10.1186/1744-8069-10-  
818       S1-O15
- 819   12.   Holliday KL, McBeth J. Recent advances in the understanding of genetic susceptibility to  
820       chronic pain and somatic symptoms. *Curr Rheumatol Rep*. 2011;13: 521–527.  
821       doi:10.1007/s11926-011-0208-4
- 822   13.   Zorina-Lichtenwalter K, Meloto CB, Khoury S, Diatchenko L. Genetic predictors of human  
823       chronic pain conditions. *Neuroscience*. 2016;338: 36–62.  
824       doi:10.1016/j.neuroscience.2016.04.041
- 825   14.   Diatchenko L, Fillingim RB, Smith SB, Maixner W. The phenotypic and genetic signatures  
826       of common musculoskeletal pain conditions. *Nat Rev Rheumatol*. 2013;9: 340–350.  
827       doi:10.1038/nrrheum.2013.43
- 828   15.   Holliday KL, Thomson W, McBeth J, Nair N. Genetics of chronic musculoskeletal pain. In:  
829       Watts RA, Conaghan PG, Denton C, Foster H, Isaacs J, Müller-Ladner U, editors. *Oxford*  
830       *Textbook of Rheumatology*. Oxford University Press; 2015.  
831       doi:10.1093/med/9780199642489.001.0001
- 832   16.   Smith SB, Maixner DW, Fillingim RB, Slade G, Gracely RH, Ambrose K, et al. Large  
833       candidate gene association study reveals genetic risk factors and therapeutic targets for  
834       fibromyalgia. *Arthritis Rheum*. 2012;64: 584–593. doi:10.1002/art.33338
- 835   17.   Richards JB, Kavvoura FK, Rivadeneira F, Stykárssdóttir U, Estrada K, Halldórsson B V, et  
836       al. Collaborative meta-analysis: associations of 150 candidate genes with osteoporosis and  
837       osteoporotic fracture. *Ann Intern Med*. 2009;151: 528–537. doi:10.7326/0003-4819-151-8-  
838       200910200-00006
- 839   18.   Peters MJ, Broer L, Willemien HLDM, Eiriksdottir G, Hocking LJ, Holliday KL, et al.  
840       Genome-wide association study meta-analysis of chronic widespread pain: evidence for

- 841 involvement of the 5p15.2 region. *Ann Rheum Dis*. 2013;72: 427–436.  
842 doi:10.1136/annrheumdis-2012-201742
- 843 19. Docampo E, Escaramís G, Gratacòs M, Villatoro S, Puig A, Kogevinas M, et al. Genome-  
844 wide analysis of single nucleotide polymorphisms and copy number variants in fibromyalgia  
845 suggest a role for the central nervous system. *Pain*. 2014;155: 1102–1109.  
846 doi:10.1016/j.pain.2014.02.016
- 847 20. Suri P, Palmer MR, Tsepilov YA, Freidin MB, Boer CG, Yau MS, et al. Genome-wide meta-  
848 analysis of 158,000 individuals of European ancestry identifies three loci associated with  
849 chronic back pain. *PLOS Genet*. 2018;14: e1007601. doi:10.1371/journal.pgen.1007601
- 850 21. Lemmelä S, Solovieva S, Shiri R, Benner C, Heliövaara M, Kettunen J, et al. Genome-wide  
851 meta-analysis of sciatica in Finnish population. *PLoS One*. 2016;11: e0163877.  
852 doi:10.1371/journal.pone.0163877
- 853 22. Sanders AE, Jain D, Sofer T, Kerr KF, Laurie CC, Shaffer JR, et al. GWAS identifies new  
854 loci for painful temporomandibular disorder: Hispanic community health study/study of  
855 Latinos. *J Dent Res*. 2017;96: 277–284. doi:10.1177/0022034516686562
- 856 23. Gatchel RJ. The biopsychosocial model of chronic pain. *Chronic Pain*. Unitech House, 2  
857 Albert Place, London N3 1QB, UK: Future Medicine Ltd; 2013. pp. 5–17.  
858 doi:10.2217/ebo.13.469
- 859 24. Vehof J, Zavos HMS, Lachance G, Hammond CJ, Williams FMK. Shared genetic factors  
860 underlie chronic pain syndromes. *Pain*. 2014;155: 1562–1568.  
861 doi:10.1016/j.pain.2014.05.002
- 862 25. Meng W, Adams M, Deary I, Palmer C, McIntosh AM, Smith B. Genetic correlations  
863 between pain phenotypes and depression and neuroticism. *bioRxiv*. 2018;  
864 doi:10.1101/362574 [PREPRINT]
- 865 26. Williams FMK, Spector TD, MacGregor AJ. Pain reporting at different body sites is  
866 explained by a single underlying genetic factor. *Rheumatology (Oxford)*. 2010;49: 1753–5.  
867 doi:10.1093/rheumatology/keq170
- 868 27. O’Neill TW, Felson DT. Mechanisms of Osteoarthritis (OA) Pain. *Current Osteoporosis*  
869 *Reports*. 2018;16: 611–616. doi:10.1007/s11914-018-0477-1
- 870 28. Sudlow C, Gallacher J, Allen N, Beral V, Burton P, Danesh J, et al. UK Biobank: An open  
871 access resource for identifying the causes of a wide range of complex diseases of middle and  
872 old age. *PLOS Med*. 2015;12: e1001779. doi:10.1371/journal.pmed.1001779
- 873 29. Fry A, Littlejohns TJ, Sudlow C, Doherty N, Adamska L, Sprosen T, et al. Comparison of  
874 sociodemographic and health-related characteristics of UK Biobank participants with those  
875 of the general population. *Am J Epidemiol*. 2017;186: 1026–1034. doi:10.1093/aje/kwx246
- 876 30. Bycroft C, Freeman C, Petkova D, Band G, Elliott LT, Sharp K, et al. Genome-wide genetic  
877 data on ~500,000 UK Biobank participants. *bioRxiv*. 2017; 166298. doi:10.1101/166298  
878 [PREPRINT]
- 879 31. Consortium the HR, McCarthy S, Das S, Kretzschmar W, Delaneau O, Wood AR, et al. A  
880 reference panel of 64,976 haplotypes for genotype imputation. *Nat Genet*. 2016;48: 1279–  
881 1283. doi:10.1038/ng.3643
- 882 32. Welsh S, Peakman T, Sheard S, Almond R. Comparison of DNA quantification methodology  
883 used in the DNA extraction protocol for the UK Biobank cohort. *BMC Genomics*. 2017;18:  
884 26. doi:10.1186/s12864-016-3391-x
- 885 33. Bycroft C, Freeman C, Petkova D, Band G, Elliott LT, Sharp K, et al. The UK Biobank  
886 resource with deep phenotyping and genomic data. *Nature*. 2018;562: 203–209.  
887 doi:10.1038/s41586-018-0579-z
- 888 34. Loh P-R, Kichaev G, Gazal S, Schoech AP, Price AL. Mixed-model association for biobank-  
889 scale datasets. *Nat Genet*. 2018;50: 906–908. doi:10.1038/s41588-018-0144-6
- 890 35. Bulik-Sullivan BK, Loh P-R, Finucane HK, Ripke S, Yang J, Schizophrenia Working Group  
891 of the Psychiatric Genomics Consortium SWG of the PG, et al. LD Score regression  
892 distinguishes confounding from polygenicity in genome-wide association studies. *Nat Genet*.

- 893 2015;47: 291–295. doi:10.1038/ng.3211
- 894 36. Axenovich T, Zorkoltseva I, Belonogova N, van Koolwijk L, Borodin P, Kirichenko A, et al.  
895 Linkage and association analyses of glaucoma related traits in a large pedigree from a Dutch  
896 genetically isolated population. *J Med Genet.* 2011;48: 802–809. doi:10.1136/jmedgenet-  
897 2011-100436
- 898 37. Ried JS, Jeff JM, Chu AY, Bragg-Gresham JL, Van Dongen J, Huffman JE, et al. A principal  
899 component meta-analysis on multiple anthropometric traits identifies novel loci for body  
900 shape. *Nat Commun.* 2016;7. doi:10.1038/ncomms13357
- 901 38. Bulik-Sullivan B, Finucane HK, Anttila V, Gusev A, Day FR, Loh P-R, et al. An atlas of  
902 genetic correlations across human diseases and traits. *Nat Genet.* 2015;47: 1236–1241.  
903 doi:10.1038/ng.3406
- 904 39. Willer CJ, Li Y, Abecasis GR. METAL: fast and efficient meta-analysis of genomewide  
905 association scans. *Bioinformatics.* 2010;26: 2190–2191. doi:10.1093/bioinformatics/btq340
- 906 40. Yang J, Ferreira T, Morris AP, Medland SE, Madden PAF, Heath AC, et al. Conditional and  
907 joint multiple-SNP analysis of GWAS summary statistics identifies additional variants  
908 influencing complex traits. *Nat Genet.* 2012;44: 369–375. doi:10.1038/ng.2213
- 909 41. Yang J, Lee SH, Goddard ME, Visscher PM. GCTA: A tool for genome-wide complex trait  
910 analysis. *Am J Hum Genet.* 2011;88: 76–82. doi:10.1016/j.ajhg.2010.11.011
- 911 42. Chang CC, Chow CC, Tellier LC, Vattikuti S, Purcell SM, Lee JJ. Second-generation  
912 PLINK: rising to the challenge of larger and richer datasets. *Gigascience.* 2015;4: 7.  
913 doi:10.1186/s13742-015-0047-8
- 914 43. McLaren W, Gil L, Hunt SE, Riat HS, Ritchie GRS, Thormann A, et al. The Ensembl  
915 Variant Effect Predictor. *Genome Biol.* 2016;17: 122. doi:10.1186/s13059-016-0974-4
- 916 44. Rogers MF, Shihab HA, Mort M, Cooper DN, Gaunt TR, Campbell C. FATHMM-XF:  
917 accurate prediction of pathogenic point mutations via extended features. *Bioinformatics.*  
918 2018;34: 511–513. doi:10.1093/bioinformatics/btx536
- 919 45. Ferlaine M, Rogers MF, Shihab HA, Mort M, Cooper DN, Gaunt TR, et al. An integrative  
920 approach to predicting the functional effects of small indels in non-coding regions of the  
921 human genome. *BMC Bioinformatics.* 2017;18: 442. doi:10.1186/s12859-017-1862-y
- 922 46. Pers TH, Karjalainen JM, Chan Y, Westra H-J, Wood AR, Yang J, et al. Biological  
923 interpretation of genome-wide association studies using predicted gene functions. *Nat*  
924 *Commun.* 2015;6: 5890. doi:10.1038/ncomms6890
- 925 47. Watanabe K, Taskesen E, van Bochoven A, Posthuma D. Functional mapping and annotation  
926 of genetic associations with FUMA. *Nat Commun.* 2017;8: 1826. doi:10.1038/s41467-017-  
927 01261-5
- 928 48. de Leeuw CA, Mooij JM, Heskes T, Posthuma D. MAGMA: Generalized gene-set analysis  
929 of GWAS data. Tang H, editor. *PLOS Comput Biol.* 2015;11: e1004219.  
930 doi:10.1371/journal.pcbi.1004219
- 931 49. Liberzon A, Subramanian A, Pinchback R, Thorvaldsdottir H, Tamayo P, Mesirov JP.  
932 Molecular signatures database (MSigDB) 3.0. *Bioinformatics.* 2011;27: 1739–1740.  
933 doi:10.1093/bioinformatics/btr260
- 934 50. Zhu Z, Zhang F, Hu H, Bakshi A, Robinson MR, Powell JE, et al. Integration of summary  
935 data from GWAS and eQTL studies predicts complex trait gene targets. *Nat Genet.* 2016;48:  
936 481–487. doi:10.1038/ng.3538
- 937 51. Westra H-J, Peters MJ, Esko T, Yaghootkar H, Schurmann C, Kettunen J, et al. Systematic  
938 identification of trans eQTLs as putative drivers of known disease associations. *Nat Genet.*  
939 2013;45: 1238–1243. doi:10.1038/ng.2756
- 940 52. GTEx Consortium TGte. The Genotype-Tissue Expression (GTEx) project. *Nat Genet.*  
941 2013;45: 580–5. doi:10.1038/ng.2653
- 942 53. Gorev DD, Shashkova TI, Pakhomov E, Torgasheva A, Klaric L, Severinov A, et al. GWAS-  
943 MAP: a platform for storage and analysis of the results of thousands of genome-wide  
944 association scans. *Bioinformatics of Genome Regulation and Structure/Systems Biology*

- 945 (BGRS/SB-2018) The Eleventh International Conference. Novosibirsk: ICG SB RAS; 2018.  
946 p. 43. doi:10.18699/BGRSSB-2018-020
- 947 54. Canela-Xandri O, Rawlik K, Tenesa A. An atlas of genetic associations in UK Biobank. *Nat*  
948 *Genet.* 2018;50: 1593–1599. doi:10.1038/s41588-018-0248-z
- 949 55. Zhou W, Nielsen JB, Fritsche LG, Dey R, Gabrielsen ME, Wolford BN, et al. Efficiently  
950 controlling for case-control imbalance and sample relatedness in large-scale genetic  
951 association studies. *Nat Genet.* 2018;50: 1335–1341. doi:10.1038/s41588-018-0184-y
- 952 56. Hemani G, Zheng J, Elsworth B, Wade KH, Haberland V, Baird D, et al. The MR-Base  
953 platform supports systematic causal inference across the human phenome. *Elife.* 2018;7:  
954 e34408. doi:10.7554/eLife.34408
- 955 57. Haller G, McCall K, Jenkitkasemwong S, Sadler B, Antunes L, Nikolov M, et al. A missense  
956 variant in *SLC39A8* is associated with severe idiopathic scoliosis. *Nat Commun.* 2018;9:  
957 4171. doi:10.1038/s41467-018-06705-0
- 958 58. Tachmazidou I, Hatzikotoulas K, Southam L, Esparza-Gordillo J, Haberland V, Zheng J, et  
959 al. Identification of new therapeutic targets for osteoarthritis through genome-wide analyses  
960 of UK Biobank data. *Nat Genet.* 2019;51: 230–236. doi:10.1038/s41588-018-0327-1
- 961 59. Li D, Achkar J-P, Haritunians T, Jacobs JP, Hui KY, D'Amato M, et al. A pleiotropic  
962 missense variant in *SLC39A8* is associated with Crohn's disease and human gut microbiome  
963 composition. *Gastroenterology.* 2016;151: 724–732. doi:10.1053/j.gastro.2016.06.051
- 964 60. Carrera N, Arrojo M, Sanjuán J, Ramos-Ríos R, Paz E, Suárez-Rama JJ, et al. Association  
965 study of nonsynonymous single nucleotide polymorphisms in schizophrenia. *Biol Psychiatry.*  
966 2012;71: 169–177. doi:10.1016/j.biopsych.2011.09.032
- 967 61. Deckers MM, Smits P, Karperien M, Ni J, Tylzanowski P, Feng P, et al. Recombinant human  
968 extracellular matrix protein 1 inhibits alkaline phosphatase activity and mineralization of  
969 mouse embryonic metatarsals in vitro. *Bone.* 2001;28: 14–20. doi:10.1016/S8756-  
970 3282(00)00428-2
- 971 62. Kong L, Zhao Y-P, Tian Q-Y, Feng J-Q, Kobayashi T, Merregaert J, et al. Extracellular  
972 matrix protein 1, a direct targeting molecule of parathyroid hormone-related peptide,  
973 negatively regulates chondrogenesis and endochondral ossification via associating with  
974 progranulin growth factor. *FASEB J.* 2016;30: 2741–2754. doi:10.1096/fj.201600261R
- 975 63. Kong L, Tian Q, Guo F, Mucignat MT, Perris R, Sercu S, et al. Interaction between cartilage  
976 oligomeric matrix protein and extracellular matrix protein 1 mediates endochondral bone  
977 growth. *Matrix Biol.* 2010;29: 276–286. doi:10.1016/j.matbio.2010.01.007
- 978 64. Fisher SA, Tremelling M, Anderson CA, Gwilliam R, Bumpstead S, Prescott NJ, et al.  
979 Genetic determinants of ulcerative colitis include the *ECM1* locus and five loci implicated in  
980 Crohn's disease. *Nat Genet.* 2008;40: 710–712. doi:10.1038/ng.145
- 981 65. Festen EA, Stokkers PC, van Diemen CC, van Bodegraven AA, Boezen HM, Crusius BJ, et  
982 al. Genetic analysis in a Dutch study sample identifies more ulcerative colitis susceptibility  
983 loci and shows their additive role in disease risk. *Am J Gastroenterol.* 2010;105: 395–402.  
984 doi:10.1038/ajg.2009.576
- 985 66. Adali G, Ersoy Tunali N, Yorulmaz E, Tiryakioglu NO, Guray Mungan S, Ulasoglu C, et al.  
986 Extracellular matrix protein 1 gene rs3737240 single nucleotide polymorphism is associated  
987 with ulcerative colitis in Turkish patients. *Turkish J Gastroenterol.* 2017;28: 254–259.  
988 doi:10.5152/tjg.2017.17043
- 989 67. Egli RJ, Southam L, Wilkins JM, Lorenzen I, Pombo-Suarez M, Gonzalez A, et al.  
990 Functional analysis of the osteoarthritis susceptibility-associated *GDF5* regulatory  
991 polymorphism. *Arthritis Rheum.* 2009;60: 2055–2064. doi:10.1002/art.24616
- 992 68. Miyamoto Y, Mabuchi A, Shi D, Kubo T, Takatori Y, Saito S, et al. A functional  
993 polymorphism in the 5' UTR of *GDF5* is associated with susceptibility to osteoarthritis. *Nat*  
994 *Genet.* 2007;39: 529–533. doi:10.1038/2005
- 995 69. Southam L, Rodriguez-Lopez J, Wilkins JM, Pombo-Suarez M, Snelling S, Gomez-Reino JJ,  
996 et al. An SNP in the 5'-UTR of *GDF5* is associated with osteoarthritis susceptibility in

- 997 Europeans and with in vivo differences in allelic expression in articular cartilage. *Hum Mol*  
998 *Genet.* 2007;16: 2226–2232. doi:10.1093/hmg/ddm174
- 999 70. Chapman K, Takahashi A, Meulenbelt I, Watson C, Rodriguez-Lopez J, Egli R, et al. A  
1000 meta-analysis of European and Asian cohorts reveals a global role of a functional SNP in the  
1001 5' UTR of GDF5 with osteoarthritis susceptibility. *Hum Mol Genet.* 2008;17: 1497–1504.  
1002 doi:10.1093/hmg/ddn038
- 1003 71. Evangelou E, Chapman K, Meulenbelt I, Karassa FB, Loughlin J, Carr A, et al. Large-scale  
1004 analysis of association between *GDF5* and *FRZB* variants and osteoarthritis of the hip, knee,  
1005 and hand. *Arthritis Rheum.* 2009;60: 1710–1721. doi:10.1002/art.24524
- 1006 72. Williams FMK, Popham M, Hart DJ, de Schepper E, Bierma-Zeinstra S, Hofman A, et al.  
1007 *GDF5* single-nucleotide polymorphism rs143383 is associated with lumbar disc degeneration  
1008 in Northern European women. *Arthritis Rheum.* 2011;63: 708–712. doi:10.1002/art.30169
- 1009 73. Dai J, Shi D, Zhu P, Qin J, Ni H, Xu Y, et al. Association of a single nucleotide  
1010 polymorphism in growth differentiate factor 5 with congenital dysplasia of the hip: a case-  
1011 control study. *Arthritis Res Ther.* 2008;10: R126. doi:10.1186/ar2540
- 1012 74. Rouault K, Scotet V, Autret S, Gaucher F, Dubrana F, Tanguy D, et al. Evidence of  
1013 association between *GDF5* polymorphisms and congenital dislocation of the hip in a  
1014 Caucasian population. *Osteoarthr Cartil.* 2010;18: 1144–1149.  
1015 doi:10.1016/j.joca.2010.05.018
- 1016 75. Komori K, Nonaka T, Okada A, Kinoh H, Hayashita-Kinoh H, Yoshida N, et al. Absence of  
1017 mechanical allodynia and Abeta-fiber sprouting after sciatic nerve injury in mice lacking  
1018 membrane-type 5 matrix metalloproteinase. *FEBS Lett.* 2004;557: 125–128.  
1019 doi:10.1016/s0014-5793(03)01458-3
- 1020 76. Liou J-T, Sum DC-W, Liu F-C, Mao C-C, Lai Y-S, Day Y-J. Spatial and temporal analysis  
1021 of nociception-related spinal cord matrix metalloproteinase expression in a murine  
1022 neuropathic pain model. *J Chinese Med Assoc.* 2013;76: 201–210.  
1023 doi:10.1016/J.JCMA.2012.12.011
- 1024 77. Clark AK, Yip PK, Grist J, Gentry C, Staniland AA, Marchand F, et al. Inhibition of spinal  
1025 microglial cathepsin S for the reversal of neuropathic pain. *Proc Natl Acad Sci.* 2007;104:  
1026 10655–10660. doi:10.1073/pnas.0610811104
- 1027 78. Clark AK, Malcangio M. Fractalkine/CX3CR1 signaling during neuropathic pain. *Front Cell*  
1028 *Neurosci.* 2014;8: 121. doi:10.3389/fncel.2014.00121
- 1029 79. Irie O, Kosaka T, Ehara T, Yokokawa F, Kanazawa T, Hirao H, et al. Discovery of orally  
1030 bioavailable cathepsin S inhibitors for the reversal of neuropathic pain. *J Med Chem.*  
1031 2008;51: 5502–5505. doi:10.1021/jm800839j
- 1032 80. Barclay J, Clark AK, Ganju P, Gentry C, Patel S, Wotherspoon G, et al. Role of the cysteine  
1033 protease cathepsin S in neuropathic hyperalgesia. *Pain.* 2007;130: 225–234.  
1034 doi:10.1016/j.pain.2006.11.017
- 1035 81. Zhang X, Wu Z, Hayashi Y, Okada R, Nakanishi H. Peripheral role of cathepsin S in Th1  
1036 cell-dependent transition of nerve injury-induced acute pain to a chronic pain state. *J*  
1037 *Neurosci.* 2014;34: 3013–3022. doi:10.1523/JNEUROSCI.3681-13.2014
- 1038 82. Kallenborn-Gerhardt W, Schröder K, Geisslinger G, Schmidtko A. NOXious signaling in  
1039 pain processing. *Pharmacol Ther.* 2013;137: 309–317. doi:10.1016/j.pharmthera.2012.11.001
- 1040 83. Ahmed Z, Douglas MR, John G, Berry M, Logan A. AMIGO3 is an NgR1/p75 co-receptor  
1041 signalling axon growth inhibition in the acute phase of adult central nervous system injury.  
1042 *PLoS One.* 2013;8: e61878. doi:10.1371/journal.pone.0061878
- 1043 84. Almutiri S, Berry M, Logan A, Ahmed Z. Non-viral-mediated suppression of AMIGO3  
1044 promotes disinhibited NT3-mediated regeneration of spinal cord dorsal column axons. *Sci*  
1045 *Rep.* 2018;8: 10707. doi:10.1038/s41598-018-29124-z
- 1046 85. Pregizer SK, Kiapour AM, Young M, Chen H, Schoor M, Liu Z, et al. Impact of broad  
1047 regulatory regions on *Gdf5* expression and function in knee development and susceptibility  
1048 to osteoarthritis. *Ann Rheum Dis.* 2018;77: 450–450. doi:10.1136/annrheumdis-2017-212475

- 1049 86. Chen H, Capellini TD, Schoor M, Mortlock DP, Reddi AH, Kingsley DM. Heads, shoulders,  
1050 elbows, knees, and toes: Modular Gdf5 enhancers control different joints in the vertebrate  
1051 skeleton. *PLOS Genet.* 2016;12: e1006454. doi:10.1371/journal.pgen.1006454
- 1052 87. Song J, Kim D, Lee CH, Lee MS, Chun C-H, Jin E-J. MicroRNA-488 regulates zinc  
1053 transporter SLC39A8/ZIP8 during pathogenesis of osteoarthritis. *J Biomed Sci.* 2013;20: 31.  
1054 doi:10.1186/1423-0127-20-31
- 1055 88. Kim J-H, Jeon J, Shin M, Won Y, Lee M, Kwak J-S, et al. Regulation of the catabolic  
1056 cascade in osteoarthritis by the zinc-ZIP8-MTF1 axis. *Cell.* 2014;156: 730–743.  
1057 doi:10.1016/j.cell.2014.01.007
- 1058 89. Kolhe R, Hunter M, Liu S, Jadeja RN, Pundkar C, Mondal AK, et al. Gender-specific  
1059 differential expression of exosomal miRNA in synovial fluid of patients with osteoarthritis.  
1060 *Sci Rep.* 2017;7: 2029. doi:10.1038/s41598-017-01905-y
- 1061 90. Lai N-S, Yu H-C, Tung C-H, Huang K-Y, Huang H-B, Lu M-C. Aberrant expression of  
1062 interleukin-23-regulated miRNAs in T cells from patients with ankylosing spondylitis.  
1063 *Arthritis Res Ther.* 2018;20: 259. doi:10.1186/s13075-018-1754-1
- 1064 91. Altmann WD, tom Dieck S, Sokolov M, Meyer AC, Sigler A, Brakebusch C, et al. Functional  
1065 inactivation of a fraction of excitatory synapses in mice deficient for the active zone protein  
1066 bassoon. *Neuron.* 2003;37: 787–800. doi:10.1016/s0896-6273(03)00088-6
- 1067 92. Spilker C, Grochowska KM, Kreutz MR. What do we learn from the murine *Jacob/Nsmf*  
1068 gene knockout for human disease? *Rare Dis.* 2016;4: e1241361.  
1069 doi:10.1080/21675511.2016.1241361
- 1070 93. Kramer PR, Wray S. Novel gene expressed in nasal region influences outgrowth of olfactory  
1071 axons and migration of luteinizing hormone-releasing hormone (LHRH) neurons. *Genes*  
1072 *Dev.* 2000;14: 1824–1834. doi:10.1101/gad.14.14.1824
- 1073 94. Hasan MT, Hernández-González S, Dogbevia G, Treviño M, Bertocchi I, Gruart A, et al.  
1074 Role of motor cortex NMDA receptors in learning-dependent synaptic plasticity of behaving  
1075 mice. *Nat Commun.* 2013;4: 2258. doi:10.1038/ncomms3258
- 1076 95. Vargha-Khadem F, Gadian DG, Copp A, Mishkin M. FOXP2 and the neuroanatomy of  
1077 speech and language. *Nat Rev Neurosci.* 2005;6: 131–138. doi:10.1038/nrn1605
- 1078 96. Konopka G, Bomar JM, Winden K, Coppola G, Jonsson ZO, Gao F, et al. Human-specific  
1079 transcriptional regulation of CNS development genes by FOXP2. *Nature.* 2009;462: 213–  
1080 217. doi:10.1038/nature08549
- 1081 97. Glahn DC, Curran JE, Winkler AM, Carless MA, Kent JW, Charlesworth JC, et al. High  
1082 dimensional endophenotype ranking in the search for major depression risk genes. *Biol*  
1083 *Psychiatry.* 2012;71: 6–14. doi:10.1016/j.biopsych.2011.08.022
- 1084 98. Suhre K, Arnold M, Bhagwat AM, Cotton RJ, Engelke R, Raffler J, et al. Connecting genetic  
1085 risk to disease end points through the human blood plasma proteome. *Nat Commun.* 2017;8:  
1086 14357. doi:10.1038/ncomms14357
- 1087 99. Suhre K, Arnold M, Bhagwat AM, Cotton RJ, Engelke R, Raffler J, et al. Connecting genetic  
1088 risk to disease end points through the human blood plasma proteome. *Nat Commun.* 2017;8:  
1089 14357. doi:10.1038/ncomms14357
- 1090 100. Okifuji A, Hare BD. The association between chronic pain and obesity. *J Pain Res.* 2015;8:  
1091 399–408. doi:10.2147/JPR.S55598
- 1092 101. Gasperi M, Herbert M, Schur E, Buchwald D, Afari N. Genetic and environmental influences  
1093 on sleep, pain, and depression symptoms in a community sample of twins. *Psychosom Med.*  
1094 2017;79: 646–654. doi:10.1097/PSY.0000000000000456
- 1095 102. Reichborn-Kjennerud T, Stoltenberg C, Tambs K, Roysamb E, Kringlen E, Torgersen S, et  
1096 al. Back-neck pain and symptoms of anxiety and depression: a population-based twin study.  
1097 *Psychol Med.* 2002;32: 1009–1020. doi:10.1017/s0033291702005950
- 1098 103. McIntosh AM, Hall LS, Zeng Y, Adams MJ, Gibson J, Wigmore E, et al. Genetic and  
1099 environmental risk for chronic pain and the contribution of risk variants for major depressive  
1100 disorder: A Family-Based Mixed-Model Analysis. *PLoS Med.* 2016;13: e1002090.



- 1101 doi:10.1371/journal.pmed.1002090  
1102 104. Freidin MB, Tsepilov YA, Palmer M, Karssen LC, Suri P, Aulchenko YS, et al. Insight into  
1103 the genetic architecture of back pain and its risk factors from a study of 509,000 individuals.  
1104 Pain. 2019;160: 1361-1373. doi:10.1097/j.pain.0000000000001514  
1105 105. Ning Z, Tsepilov YA, Sharapov SZ, Grishenko AK, Feng X, Shirali M, et al. Beyond power:  
1106 Multivariate discovery, replication, and interpretation of pleiotropic loci using summary  
1107 association statistics. bioRxiv. 2019; 022269. doi:10.1101/022269 [PREPRINT]  
1108 106. O'Reilly PF, Hoggart CJ, Pomyen Y, Calboli FCF, Elliott P, Jarvelin M-R, et al. MultiPhen:  
1109 Joint model of multiple phenotypes can increase discovery in GWAS. PLoS One. 2012;7:  
1110 e34861. doi:10.1371/journal.pone.0034861  
1111 107. Valdes AM, Doherty SA, Zhang W, Muir KR, Maciewicz RA, Doherty M. Inverse  
1112 relationship between preoperative radiographic severity and postoperative pain in patients  
1113 with osteoarthritis who have undergone total joint arthroplasty. Semin Arthritis Rheum.  
1114 2012;41: 568–575. doi:10.1016/j.semarthrit.2011.07.002  
1115 108. Johnston KJA, Adams MJ, Nicholl BI, Ward J, Strawbridge RJ, Ferguson A, et al. Genome-  
1116 wide association study of multisite chronic pain in UK Biobank. PLoS Genet. 2019;15:  
1117 e1008164. doi:10.1371/journal.pgen.1008164  
1118
